# Supplementary material for: Fault Interpretation Uncertainties using Seismic Data, and the Effectson Fault Seal Analysis: A Case Study from the Horda Platform, withImplications for CO 2 storage
Source: Copernicus journal article supplement (doi:10.5194/se-2021-23), 2021-03-19
Supplement: Supplementary file [file se-2021-23-RC1-supplement.pdf]

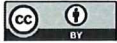

# Fault Interpretation Uncertainties using Seismic Data, and the Effects on Fault Seal Analysis: A Case Study from the Horda Platform, with Implications for CO<sub>2</sub> storage

Emma A. H. Michie<sup>1</sup>, Mark J. Mulrooney<sup>1</sup>, Alvar Braathen<sup>1</sup>

<sup>1</sup>Department of Geosciences, University of Oslo, Sem Sælands Vei 1, Oslo 0371, Norway

Correspondence to: Emma Michie ([e.m.haines@geo.uio.no](mailto:e.m.haines@geo.uio.no))

**Abstract.** Significant uncertainties occur through varying methodologies when interpreting faults using seismic data. These uncertainties are carried through to the interpretation of how faults may act as baffles/barriers or increase fluid flow. How fault segments are picked when interpreting structures, i.e. what seismic line spacing is specified, as well as what surface generation algorithm is used, will dictate how detailed the surface is, and hence will impact any further interpretation such as fault seal or fault growth models. We can observe that an optimum spacing for fault interpretation for this case study is set at approximately 100 m. It appears that any additional detail through interpretation with a line spacing of  $\leq 50$  m adds complexity associated with sensitivities by the individual interpreter. Further, the location of all fault segmentation identified on Throw-Distance plots using the finest line spacing are also observed when 100 m line spacing is used. Hence, interpreting at a finer scale may not necessarily improve the subsurface model and any related analysis, but in fact lead to the production of very rough surfaces, which impacts any further fault analysis. Interpreting on spacing greater than 100 m often leads to overly smoothed fault surfaces that miss details that could be crucial, both for fault seal as well as for fault growth models. Uncertainty in seismic interpretation methodology will follow through to fault seal analysis, specifically for analysis of whether *in situ* stresses combined with increased pressure through CO<sub>2</sub> injection will act to reactivate the faults, leading to up-fault fluid flow / seep. We have shown that changing picking strategies alter the interpreted stability of the fault, where picking with an increased line spacing has shown to increase the overall fault stability. Picking strategy has shown to have minor, although potentially crucial impact on the predicted Shale Gouge Ratio.

Handwritten notes in red: (1) rougher? (2) also orientation + line spacing/bin spacing (3) time-saving issue too

## 1. Introduction

In order to achieve targets to reduce emissions of greenhouse gases as outlined by the European Commission (IPCC 2014; IPCC 2018; EC 2018), methods of carbon capture and storage can be utilized to reach the 2°C goal of the Paris Agreement (e.g. Birol, 2008; Rogelj et al., 2016). One candidate for a CO<sub>2</sub> storage site has been identified in the Norwegian North Sea, which is the focus of this study: the saline aquifer in the Sognefjord Formation at the Smeaheia site (Halland et al., 2011;

Handwritten notes in red: maximum warming

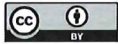

Statoil, 2016; Lothe et al., 2019). Several studies have been performed on the feasibility of the Smeaheia CO<sub>2</sub> storage site  
30 (e.g. Sundal et al., 2014; Lauritsen et al., 2018; Lothe et al., 2019; Mulrooney et al., 2020; Wu et al., 2021). The Alpha prospect  
identified for this site is located within a tilted fault block bound by a deep-seated basement fault: the Vette Fault Zone (VFZ)  
(Skurtveit et al., 2012; Mulrooney et al., 2020), and hence a high fault sealing capacity is required to retain the injected CO<sub>2</sub>.  
Further, it is necessary for the fault to have no reactivation potential. Both of these parameters hinge on generating an accurate  
geological model, performed using suitable picking strategies, both for fault surface picking and for fault polygon (horizon-  
35 fault intersection) picking.

In order to accurately capture the properties of the VFZ, <sup>and to better</sup> for ~~full evaluation~~<sup>2</sup> of the potential storage site, correct interpretation  
methodologies are required. Generally, seismic interpretation involves the picking of seismic reflectors <sup>4 reflection</sup> in order to generate  
geologically reasonable <sup>interpretations of the</sup> structures <sup>structure</sup> of the subsurface (e.g. Badley, 1985; Avseth et al., 2010). Seismic interpretation of faults  
can be used in several ways, e.g. geomechanical analysis (specifically fault stability), fault seal analysis, and to better  
40 understand fault growth, which <sup>collectively</sup> can influence fluid flow migration prediction. The ease and accuracy of seismic interpretation  
is continually increasing, associated with advancements in geophysical and rock physics tools (Avseth et al., 2010), as well as  
the increased use of automated technologies (e.g. Araya-Polo et al., 2017). However, there remains great uncertainties with  
fault interpretation strategies. Up until recently no standardized picking strategies have been documented for fault growth  
models and reactivation analysis. Tao and Alves (2019) documented an approach combining seismic and outcrop at different  
45 scales to identify a best practice methodology for fault interpretation based on fault size. However, no studies have addressed  
how differences in picking strategies may influence any fault seal analysis performed. This contribution provides a case study  
attempting to qualitatively and quantitatively analyse how differences in picking strategies, for both fault surface picking and  
fault-horizon cut-off (polygon) picking, may influence any interpretation of fault growth models, <sup>and</sup> fault stability ~~analysis~~, <sup>and</sup>  
~~as well as~~ <sup>and</sup> fault seal analysis, which in turn influences the assessment of the viability of a CO<sub>2</sub> storage site. Further, we discuss  
50 the influence of manual interpretation (i.e. human error), adding noise and irregularity, as well as seismic resolution and  
triangulation method, causing smoothing of the data, on fault analysis, <sup>by doing this we</sup> in order to attempt to derive the best practice method  
for fault interpretation using seismic data to accurately capture all necessary data in the shortest amount of time (Figure 1).

### 1.1 Fault Growth Models

55 Analysing the sealing potential of faults within the subsurface is crucial, not only by using traditional methods (see section  
1.3), but also by use of fault growth models. How faults grow and link with other faults alter their hydraulic behavior along  
fault-strike. For example, areas of soft-linked relay zones can act as conduits to fluid flow (e.g. Trudgill and Cartwright 1994;  
Childs et al., 1995; Peacock and Sanderson, 1994; Bense and Van Balen, 2004; Rotevatn et al., 2009). Further, an increase in  
deformation band and fracture intensity has been recorded at these areas of fault-fault interactions (e.g. Peacock and Sanderson,  
60 1994; Shipton et al., 2005; Rotevatn et al., 2007), which may ultimately act to alter the hydraulic properties of the fault zone  
once these relay zones become hard-linked. Hence, accurately capturing the geometry of faults within the subsurface is crucial

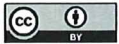

to fully understand, and accurately interpret how the faults have grown, and hence identify areas of possible fluid flow, or where high 'risk' may occur.

Faults can be observed as either isolated, linked or composite fault segments (Benedicto et al., 2003). Two principal fault growth models have been proposed: isolated fault models (e.g. Walsh and Watterson, 1988; Cowie and Scholz, 1992a; Cowie and Scholz, 1992b; Cartwright et al., 1995; Dawers and Anders, 1995; Huggins et al., 1995; Walsh et al., 2003; Jackson and Rotevatn, 2013; Rotevatn et al., 2019) and the constant length fault models (Childs et al., 1995; Cowie, 1998; Morley et al., 1999; Walsh et al., 2002, 2003; Nicol et al., 2005; Nicol et al., 2010; Jackson and Rotevatn, 2013; Jackson et al., 2017; Rotevatn et al., 2018, 2019). The isolated fault model describes faults that form initially by discrete, isolated segments that propagate and link-up laterally with time, progressively increasing displacement and length. Conversely, the constant length model describes faults that have established their final fault length at an early stage in the evolution, after which growth occurs through cumulative displacement increase. It has recently been suggested that faults grow by a hybrid of growth behaviours (Rotevatn et al., 2019), although other models have also been proposed. The fault growth models are complemented by Throw-Distance (T-D) plots, which are often used to identify areas of fault segment linkage (e.g. Cartwright et al., 1996). However, it is important to note that using T-D plots of the final fault length alone to understand fault growth may lead to ambiguous conclusions relating to which growth model best describes the evolution, in part due to the limit of seismic resolution. The conceptual displacement model describes faults as generally elliptical shaped structures, whereby the displacement will be the greatest in the centre of the fault, dissipating towards the tip (e.g. Walsh and Watterson, 1988; Morley et al., 1990; Peacock and Sanderson, 1991; Walsh and Watterson, 1991; Nicol et al., 1996). Through fault growth, nearby isolated faults can begin to interact, either vertically and/or laterally, leading to relay zones (Morley et al., 1990; Peacock and Sanderson, 1991). These relay zones are soft-linked structures, where the displacement maxima are not significantly influenced by the linkage. Relay zones can progress to form hard-linked structures where the relays become breached, and a common displacement maximum occurs along the length of this connected fault. This continues through fault evolution and can lead to fault zones where these relict relay zones are no longer obvious in map view, however can be identified through subtle variations in displacement along fault-strike and down fault-dip. However, such analysis is highly dependent on the accuracy and detailed nature of the interpreted faults in 3D.

Through detailed seismic interpretation of faults in the subsurface, areas of fault segmentation may be identified, which is critical for analysis such as understanding how the faults have grown, estimating the damage zone width, assessing the fault seal potential, and hence also assessing the viability of a site for CO<sub>2</sub> storage. It has been shown that seismic resolution controls the accuracy of the fault geometries produced, particularly when upscaling to a geocellular grid (e.g. Manzocchi et al., 2010), and sampling gaps can be caused by incorrect sampling strategies (Kim and Sanderson, 2005; Torabi and Berg, 2011), which in turn will reduce the accuracy of all fault analysis performed. Further, different seismic interpretation techniques, specifically using different seismic line spacing, will influence the resolution of the final fault surface produced, and hence may cause inaccuracies when interpreting fault segmentation (Tao and Alves, 2019).

⑤ what's the difference?

propagating

⑥ use Childs et al. (2017) terminology

⑧ C-L model permits relay breaching - See J edit

what does this mean?

decreasing

the formation of

al. reply to Tao + Alves

⑨ failure to include ductile element of def. See also J et al. 2017

⑩ abandoned splays, which are req. prior to relay breaching

⑪ already stated a couple of times. 90 rrrrrrr

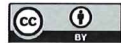

⊗ Map vs. sections with approaches, e.g. time slices + variance + automated picking / ants

## 1.2 Fault Seal Analysis: Geomechanical Analysis

Understanding the sealing potential of faults in the subsurface is crucial when assessing sites for CO<sub>2</sub> storage, <sup>especially when trying</sup> specifically it is ~~vital~~ <sup>during</sup> to predict the sealing behavior of faults when fluid pressures are progressively increased through this CO<sub>2</sub> injection. Hence, analysis is required to assess whether the pressure generated by the CO<sub>2</sub> column will cause the faults to become unstable and reactivate, causing vertical CO<sub>2</sub> migration up the fault through dilatant micro-fracturing (e.g. Barton et al., 1995; Streit and Hillis, 2004; Rutqvist et al., 2007; Chiaramonte et al., 2008; Ferrill et al., 1999a).

Fault stability analysis requires the use of 3D fault surface models, where the orientation and magnitude of the *in situ* stresses and pore pressure are used along with the predicted fault rock mechanical properties to assess the conditions <sup>under which</sup> where the modelled faults may be reactivated (e.g. Ferrill et al., 1999a; Mildren et al., 2005). This method has previously been used to assess the stability of faults for CO<sub>2</sub> storage sites in order to estimate the column of CO<sub>2</sub> that faults can hold before reactivation may occur (e.g. Streit and Hillis, 2004; Chiaramonte et al., 2008). Since the assessment of fault reactivation potential requires an accurate 3D fault surface model, any uncertainty generated during fault interpretation and fault surface creation through differences in sampling methodologies will be inherited by the geomechanical analysis.

## 1.3 Fault Seal Analysis: Capillary Seal

Methods for predicting the sealing potential of faults within siliciclastic reservoirs have received significant attention over the past few decades (e.g. Lindsay et al., 1993; Childs et al., 1997; Fristad et al., 1997; Fulljames et al., 1997; Knipe et al., 1997; Yielding et al., 1997, 2002, 2010; Bretan et al., 2003; Færseth et al., 2006). In general, these methodologies describe a capillary seal, where surface tension forces between the hydrocarbon and water prevent the hydrocarbon phase from entering the water-wet phase, hence the amount of hydrocarbons that can be contained by the fault is controlled by the capillary entry pressure (Smith, 1980; Jennings, 1987; Watts, 1987). The capillary entry pressure <sup>(depends on the hydrocarbon-water interface)</sup> the difference between the hydrocarbon phase and water phase densities, and the acceleration of gravity. Leakage of ~~the~~ hydrocarbons through the water-wet fault zone occurs when the difference in pressure between the hydrocarbon and water phases (the buoyancy pressure) exceeds that of capillary threshold pressure (Fulljames et al., 1997). The capillary threshold pressure is controlled by the pore throat size, which is in turn controlled by the composition of the fault rock (Yielding et al., 1997). It is important to note, however, the differences in densities, wettability and interfacial tension that occurs in CO<sub>2</sub>-water when compared to hydrocarbon-water (as is the case in this study), causes differences in capillary entry pressure and ultimately <sup>the predicted</sup> column height ~~predicted~~ (Chiquet et al., 2007; Daniel and Kaldi 2009; Bretan et al., 2011; Miocic et al., 2019; Kayolyté et al., 2020).

Where clay or shale layers are present within a succession, during faulting these layers can either be juxtaposed against the reservoir layer, or become entrained into a fault, either as a smear or as a gouge (Allan, 1989; Knipe, 1992; Lindsay et al., 1993; Yielding et al., 1997). A shale smear has been described as an abrasive shale veneer that forms a constant thickness

⑫ what about it? Tile shops, etc?

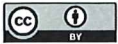

down the fault (Lindsay et al., 1993). A fault gouge, or phyllosilicate framework fault rock (PFFR), is used to describe fault rocks that entrain clay within the fault zone, creating mixing with framework grains (Fisher and Knipe, 1998). Both mechanisms have the ability to create a barrier to fluid flow. Hence, fault seal analysis is traditionally completed by a combination of juxtaposition seal analysis, i.e. creating Allan diagrams (Allan, 1989), identifying areas where there may be communication across the fault, specifically at areas of sand-sand juxtapositions. This is then followed by a prediction of the fault rock composition by use of <sup>various</sup> industry-lead <sup>standard</sup> algorithms, e.g. the Shale Smear Factor (SSF; Lindsay et al., 1993), and the Shale Gouge Ratio (SGR; Yielding et al., 1997). Assessing the likely composition, specifically quantifying the amount of shale entrained into the fault at areas of sand-sand juxtapositions, is used to predict the likelihood of the fault to seal or act as a conduit to flow.

The Shale Smear Factor (SSF) calculates the likelihood of shale smear continuity:

$$SSF = \frac{\text{Fault throw}}{\text{Shale layer thickness}} \quad (1)$$

Both outcrop and experimental shale smears have been studied, and suggest that smears become discontinuous at  $SSF > 4-10$  (e.g. Lindsay et al., 1993; Aydin and Eyal, 2002; Takahashi 2003; Færseth, 2006). It has been noted that larger faults tend to display lower critical threshold values between continuous and discontinuous smears (Færseth, 2006).

The Shale Gouge Ratio (SGR) uses the proportion of clay (VClay or VShale) that has moved past a point on the fault to calculate the amount of clay within the fault rock:

$$SGR = \frac{\sum(V_{clay} \times \Delta z)}{\text{throw}} \quad (2)$$

where  $\Delta z$  is the bed thickness and VClay is the volumetric clay fraction (Yielding et al., 1997). A higher SGR generally corresponds to an increase in phyllosilicates entrained into the fault (e.g. Foxford et al., 1998; Yielding, 2002; van der Zee & Urai, 2005), which in turn is likely to lead to a higher capillary threshold pressure, which is predicted to retain a higher hydrocarbon column held back by the fault (e.g. Yielding et al., 2010). Hence, the next step in a fault seal analysis workflow is to predict the column that can be held back by the fault. This can be done by using *in situ* pressure data from wells on either side of the fault (across-fault pressure) where there is a common aquifer, or on one side of the fault (buoyancy pressure). However, this data is scarcely available, hence an empirical calibration is often performed using global datasets (e.g. Bretan et al., 2003; Yielding et al., 2010), or by using deterministic calibration, where a relationship between measured capillary threshold pressures using core plugs and measured clay content has been defined (Sperrevik et al., 2002). For applicability in CO<sub>2</sub> storage, these calibrations would need to be altered to take into consideration the different densities, wettability and interfacial tension (Bretan et al., 2011; Miocic et al., 2019; Kayolytè et al., 2020). For predicting fault seal for CO<sub>2</sub> storage, estimating the column of CO<sub>2</sub> that can be held back by the fault is crucial. However, for ~~means of~~ simplicity, this paper focusses on how interpretation influences the juxtaposition of sand bodies and calculated SGR, rather attempting to predict any column heights, due to the implicit uncertainties that are imposed by the CO<sub>2</sub>-water-rock systems.

(3) not sure I follow. In fact, is this needed? In fact, is much of this general review critical to the paper? No figs to really help guide the non-expert

a rather lengthy, wordy sentence. We can split it.

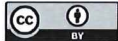

## 160 2. Study Area

The Smeaheia site, see Mulrooney et al. (2020, and references therein), is located approximately 40 km Northwest of the Kollsnes processing plant, and around 20 km East of Troll East, in the Northern Horda Platform (Figure 2). The Northern Horda Platform is a 300 km by 100 km, N-S elongated structural high along the eastern margin of the northern North Sea (Færseth, 1996; Whipp et al., 2014; Duffy et al., 2015; Mulrooney et al., 2020; Figure 2). Many deep-seated, west-dipping, basement faults occur within the Horda Platform, generating several half graben bounding fault systems with km-scale throws (Badley et al., 1988; Yielding et al., 1991; Færseth 1996; Bell et al., 2014; Whipp et al., 2014).

Two first-order, thick-skinned faults occur within the Smeaheia site: the Vette Fault Zone (VFZ) and the Øy garden Fault Complex (ØFC) (Figure 2), which bound an east-tilting half graben following a roughly North-South trend. The focus of this study is the VFZ, bounding the gently dipping 3-way closure Alpha prospect in its footwall (Figure 2). It is located 20 km to the East of the Tusse fault; a half graben-bounding, sealing fault allowing for the accumulation of hydrocarbons in Troll East. The VFZ has been interpreted using the GN1101 survey. However, it is important to note that this survey does not extend far enough to the North and South to interpret the entire fault structure. Hence, only the section of fault that is observed in the GN1101 survey is analysed.

Smaller-scale, thin-skinned Northwest-Southeast striking faults are also recorded in the Smeaheia site (Mulrooney et al., 2020). These faults only affect post-Upper Triassic stratigraphy, and have low throws of less than 100 m. These faults are associated with Jurassic to Cretaceous rifting in the northern North Sea, which also caused reactivation of the Permo-Triassic basement-seated faults (Færseth et al., 1995; Deng et al., 2017). However, these smaller-scale faults are not the focus of this study.

This study focusses on the Sognefjord and Fensfjord formations as storage reservoirs for CO<sub>2</sub> (Figure 3), both of the Viking Group that is of Middle-Upper Jurassic age. These units represent stacked saline aquifers at this location. They are composed of coastal to shallow marine deposits dominated by sandstones with finer-grained interlayers (Dreyer et al., 2005; Holgate et al., 2013; Patruno et al., 2015). Of these, the Sognefjord Formation at the top of the stacked aquifer offers the best properties. It occurs at approximately 1200 m depth at the Alpha prospect, and has a permeability of 440-4000 mD and a porosity of 30-39% (Statoil, 2016; Ringrose, 2017; Mondol et al., 2018). The Sognefjord Formation is capped by deep marine, organic-rich mudstones of the Draupne Formation, as well as deep water marls, carbonates and shaley units in the Cromer Knoll and Shetland Groups above the Base Cretaceous Unconformity (Nybakken and Bäckstrøm, 1989; Isaksen and Ledjie, 2001; Kyrkjebø et al., 2004; Justwan and Dahl, 2005; Gradstein and Waters, 2016; Figure 3).

The Alpha prospect has been drilled for exploration purposes, due to hypothesized hydrocarbon migration scenarios into the Smeaheia site (Goldsmith, 2000); however, well data from the Alpha prospect (32/4-1) has recorded no oil shows, indicating that no hydrocarbon migration has occurred into the Smeaheia site (32/4-1 T2 Final Well report 1997). As a result, the Smeaheia has been assessed for the potential for CO<sub>2</sub> storage in a saline aquifer, as it fulfills requirements for substantial datasets, minimal influence on nearby production sites, and proximity to infrastructure.

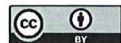

### 3. Methodology

Faults and horizons have been interpreted using one main 3D survey: GN1101, covering the Smeaheia area (Figure 2). The GN1101 3D survey is a time-migrated dataset that has subsequently been depth converted using a velocity model that has been created using quality controlled Time-Depth curves from 15 wells from the Troll and Smeaheia area: 31/2-1, 31/2-2R, 31/2-4R, 31/2-5, 31/2-8, 31/3-1, 31/3-3, 31/5-2, 31/6-1, 31/6-2R, 31/6-3, 31/6-6, 32/2-1, 32/4-1 T2 and 32/4-3 S (Figure 2). Other wells in the area have no velocity data. The GN1101 survey has good seismic resolution, suitable for detailed structural interpretation. The GN1101 survey was shot in 2011 by Gassnova SF, with an inline spacing of 25 m and a crossline spacing of 12.5 m, covering an area of 442.25 km<sup>2</sup>. Crosslines are oriented 065°, and inlines oriented 155°. GN1101 has a normal polarity.

Five seismic horizons have been interpreted: top-Shetland Group, top-Cromer Knoll Group, top-Draupne Formation, top-Sognefjord Formation, and top-Brent Group. The aforementioned wells with quality controlled (QC) Time-Depth Curves used for depth conversion have been used to aid seismic interpretation by use of well pick locations.

The VFZ has been interpreted using different line spacing in order to assess the optimum picking methodology. Faults have been picked every 1, 2, 4, 8, 16 and 32 lines, corresponding to 25 m, 50 m, 100 m, 200 m, 400 m and 800 m spacing, respectively. Where every line spacing has been used, rigorous QC-ing has been performed to ensure all nodes honour the fault surface precisely, and to maintain continuity of the fault location between each inline. Note that, since the GN1101 survey has been shot orthogonal to the VFZ strike trend (as is often the case, where surveys are shot perpendicular to main fault trend to best capture their nature), only the inline orientation has been picked within this assessment. Adding cross-lines would simply add increased noise due to the significant picking uncertainty when a fault is parallel to the seismic line, causing mis-matches between the interpretation on inlines and cross-lines. Time-slices using a variance cube have also been utilized to guide interpretation, as these often provide an improved visual representation of the precise location of the fault.

Interpretation and fault surface generation was performed using the software T7. The fault surfaces have been created using different algorithms, illustrated in Figure 4: 1) unconstrained triangulation, 3) constrained triangulation, and 3) gridded. A combination of equant and irregular triangles of difference sizes have also been used for each triangulation algorithm. Unconstrained triangulation generates a fault surface that triangulates fault segments *without* constraining the surface to conform to the lines between adjacent points on the same fault segment. Constrained triangulation generates a surface that conforms to the lines between adjacent points on the same fault segment. Both uncontained and constrained triangulation honour all data points, and the number of triangles is controlled by the number of data points on all fault segments. Gridded modelling strategy consist of regularly sampled points with a grid cell dimension varying with distance between the interpreted seismic lines, hence grid cell dimensions vary with sampling strategies. Note that no further smoothing has been applied to any of these modelling strategies. Unconstrained triangulation is the main algorithm shown throughout, as this offers a 'middle-ground' modelling strategy, honouring data points but allowing some smoothing of the surface.

(15) calc. spatial res. otherwise "good" is a little vague. Need to relate to picking line spacing?

(17) but under what you mean here. Was such QC not applied for other line spacings?

(18) but what about a lineslice-based picking approach?

(19) no expert in gridding approaches... and it is not 100% clear to me from text + fig. 4 how they vary or what their material impact are. Other reviewers may have a view. My concern is how gridding approach may compound/influence fault geom. in addition to picking strategy

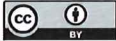

225 (Attributes are calculated and mapped onto the fault surface, such as strike, dip, throw, VShale, fault stability (e.g. slip tendency), SGR etc. These attributes are mapped onto the fault at a resolution of 8 m lateral by 4 m vertical, providing an optimum resolution without the need to extend processing time.

The aforementioned methods of fault surface generation are used to assess the differences in fault strike, dip and geomechanical attributes, when analyzing fault growth and fault stability. Further, fault polygons (intersection lines between horizon and fault) have been picked on each of the 6 fault surface iterations, for the 5 mapped seismic horizons, again using different line spacing to aid with polygon picking. Fault polygons have been picked using a combination of seismic slicing, at a distance of 10 m into the footwall and hanging wall of the fault to remove any seismic noise, as well as using inlines at different line spacing to accurately assess where the horizons intersect the fault (example shown in Figure 5). The line spacing used is the same as that for interpreting the fault segments, for example a fault interpreted on every 8 lines (200 m spacing) also uses inlines at 200 m spacing to aid with picking the polygons. These polygons are used to calculate fault throw, which is mapped onto the 3D fault surfaces, and to produce Throw-Distance (T-D) plots, used to analyse fault growth. Complications arise when picking fault polygons due to significant drag occurring in the hanging wall of the VFZ. Polygons have been picked honouring the drag, in order to accurately capture the juxtapositions, as well as ignoring the drag, in order to accurately interpret fault growth (Figure 5).

230 (Assessing the differences in fault stability between each picking strategy has been performed. This is crucial when considering how the pressure increase due to CO<sub>2</sub> injection may influence the reactivation potential of any bounding or intra-basin faults. *In situ* stress data has been derived from an internal Equinor data package (unpublished), using data from four nearby wells: 31/6-3, 31/6-6, 32/4-1 and 32/2-1. Vertical stress (S<sub>v</sub>) was determined from the overburden gradient. The minimum horizontal stress (SH<sub>min</sub>) was determined from the fracture gradient and the pore pressure (P<sub>p</sub>) is measured as being hydrostatic. The maximum horizontal stress (SH<sub>max</sub>) is assumed to be the same as SH<sub>min</sub>, using data documenting the stress orientation and faulting regime based on exploration and production wells. This area of the northern North Sea is found to be within a normal faulting regime with almost isotropic horizontal stresses at shallower (<5 km) levels (Hillis and Nelson, 2005; Andrews et al., 2016; Skurtveit et al., 2018). The orientation for SH<sub>max</sub> is likely to be trending E-W, based on borehole breakout (Brudy and Kjørholt, 2001; Skurtveit et al., 2018). The *in situ* stress regime is summarised in Figure 3 and Table 1. The cohesion used for this study has been set as 0.5 MPa, and the frictional coefficient as 0.45. These values have been chosen based on the modelled SGR where the Sognefjord Formation is observed in the footwall. Values of approximately 40% SGR have been calculated (see section 4.2), which has been used to estimate the cohesion and frictional coefficient values based on previously published values (Meng et al., 2016, and references therein). Results of slip tendency, dilation tendency and fracture stability are shown within this paper. Slip tendency is the ratio of resolved shear stress ( $\tau$ ) to normal stress ( $\sigma_n$ ) on a plane, where the higher the value, the more likely the fault will slip by shear failure (Morris et al., 1996). Shear failure will generally occur at approximately 0.6, which is the coefficient of static friction. However, it is important to note that the coefficient of static friction is unknown in this scenario. The likelihood of the fault to slip depends on the stress field and orientation / dip of the fault surface. Dilation tendency is the relative probability of a plane to dilate within the current stress field (Ferrill et al.,

20 again need to tell non-expert what these are via text, cited ref, or supp material sketch/text

20 term 'polygons' is confusing to me. To me, this is a map that defines fault polygons that have. But here the term appears to be used differently. To me, you're mapping 'cut-offs'

We need

23 Again, not my area of expertise



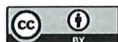

1999b). This is a ratio between 0 and 1, where the higher the value, the more likely a fault will go into tensile failure. Fracture stability (FAST) estimates the pore pressure required to reduce stresses that forces a fault into either shear or extensional failure (Mildren et al., 2005). Both dilation tendency and fracture stability take into consideration the cohesion and tensile strength of the fault rock.

How the picking strategies may influence fault seal analysis by means of juxtaposition diagrams (Allan, 1989) and calculated SGR (Yielding et al., 1997), has also been analysed. A gamma ray log from nearby well 31/6-6 (Figure 2) has been converted into VShale (Figure 3), using a simple transform approach, where 100% VShale is assigned to the maximum average gamma-ray value, and 0% VShale is assigned to the minimum average gamma-ray value, and a linear relationship is assumed (e.g. Rider, 2000; Lyon et al., 2005). Note that only one well with one non-QC'd VShale log, using the cursory gamma-ray to VShale transform, has been used, simply as a proxy to identify how picking strategies may influence the overall fault seal analysis, rather than to perform any rigorous fault seal analysis. If the same VShale curve is used for all instances, then any differences identified in each scenario is simply a product of the picking strategy used. The VShale is draped onto the fault, using the locations of picked polygons, which tie with well picks, and is used along with the throw to calculate the SGR along the 3D fault surface.

#### 4. Results

The extent of how picked fault segments and fault polygons vary through using different picking strategies is assessed within this paper, by examining disparities in fault segmentation, fault seal and fault reactivation potential.

##### 4.1. Fault Segmentation Analysis

Seismic-scale fault segmentation can be identified through fault-framework modelling, providing an indication of how these larger scale structures have developed and grown with fault propagation. Two main attributes are used to aid predictions of how the faults have grown: throw profiles and strike variations. Sudden changes in throw along fault-strike may indicate where initial seismic-scale fault array segments were located, and have subsequently joined through fault growth (e.g. Cartwright et al., 1996). Similarly, any sudden changes in strike can indicate where two initial separated faults have consequently joined, due to the variations in strike of the initial fault segments through areas of breached relay zones. It is important to note, however, that not all changes in fault strike may be caused by fault linkage, and not all fault linkage will result in a change in fault strike. (This may be particularly true when dip-linkage versus lateral-linkage is considered.) Hence, analysis using a combination of these fault attributes improves our understanding of the seismic-scale fault growth history. Moreover, this analysis cannot perform fault growth analysis for any fault segmentation that is below seismic resolution, i.e. early in the fault growth phases.

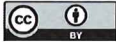

290

#### 4.1.1. Throw Profiles

(Throw profiles along fault strike are useful for understanding the seismic-scale fault growth history) These profiles highlight areas where the current fault surface was once segmented. However, the location and nature of fault interactions and number of segments within initial fault array varies with picking strategy (Figure 6). Picking on every line (25 m spacing) is the finest resolution in this example, and is assumed to provide the best picking strategy to identify all areas of seismic-scale fault segmentation. Using every line, we can interpret 7 fault segments, identified by 6 areas of fault overlap (Figure 6, highlighted by dashed vertical lines). Areas of fault overlap are interpreted where significant drops in throw are observed, varying from the overall throw profile, and are not interpreted to be caused by other currently intersecting faults. Increasing the picking spacing decreases the detail required for accurate fault growth analysis. However, we can observe that increasing the spacing to 100 m retains the level of detail needed to identify all fault segments that are also identified using every line spacing (Figure 6A vs Figure 6C). Beyond this spacing, the level of detail is decreased causing the ability to identify some fault segmentation to be lost. This is most pronounced when the area of fault overlap, hence change in throw amplitude, is subtle. This can be observed on Figure 6D, where a picking spacing of 200 m loses the segmentation interpreted at approximately 1375 m, due to the low throw variation (*c.* 25 m throw amplitude) at this location. Using 400 m and 800 m picking spacing loses significant detail, such that identification of fault segments is not possible for all cases where fault interactions caused throw variations of lower than 75 m (Figure 6E and F). Further, the precise location of interpreted fault segmentation is often incorrect, such as that identified at 3000 m, which should in fact be two separate fault segments (Figure 6E and F).

To provide more detail, we show how two picking strategies compare by normalizing the distance along the fault (Figure 7, top), and by showing fault throw attributes and contours on the triangulated fault surfaces (Figure 7, bottom). Since the widest spacing that can be used without losing any segmentation detail is 100 m, we compare this example with the throw profile generated by picking on every 800 m line spacing (Figure 7). We have highlighted four localities along the fault where fault segmentation is observed on the narrower line spacing and where these segmentations should be when picked every 800 m (Figure 7, black circles). However, due to the coarse picking, areas where decreased or increased displacement occur are not sampled, and hence the locations for fault segmentation are missed.

315

#### 4.1.2. Strike

Through examination of strike variations along the fault surface, we can see a sudden change in principal strike direction shown at roughly 9000 m from the North in the fault plane diagrams in Figure 8. The strike changes from approximately 320 to 360 degrees in the North to approximately 000 to 025 degrees in the South. Further, corrugations are observed along fault-strike, which may be associated with fault segmentation (e.g. Ferrill et al., 1999). However, variation in this strike trend occurs with differing picking strategies, as well as the amount of observed corrugations. Although the significant change in trend

24) What do you mean by "overlap"?  
Overlapping segs in map-view assoc.  
with relay + splays? Under here.  
(and below)  
This rel. to what's driving these minima; eg. could it be due to ⊕ drag in these locations?  
Again, you've said this a few times already, so this could be cut to reduce repetition

25) Which strike level are you showing here?  
Should be base SR.  
Not clear in methods

26) Why do you need to normalize given the horiz. distance is the same for all profiles, in respect. of picking strat?

27) I do not understand what you mean by this.  
Why "should be"? I can't see the minima in the black circles in the 800 m spacing plot. ~~Also, and~~

28) could be "draft" in the picking too, right?  
See BR. paper by ~~Ferrill~~ Zwiesch

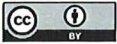

observed at 9000 m in the fault plane diagrams from the North exists regardless of picking strategy, faults that are picked on 25 m and 50 m line spacing create highly irregular surfaces, where significant ~~alternations between different~~ strike values is observed over relatively <sup>short</sup> minor distances. While this is also observed for fault surfaces picked on 100 m and 200 m line spacing, the irregularity of the surfaces is considerably less. However, using widely spaced picking strategies, i.e. 400 m and 800 m line spacing, lead to smoothing of the overall fault structure. (While this may give an overall impression of a large change in strike, detail is lost) However, the detail is important when interpreting how the faults have grown by fault-fault interaction, and hence areas that may impact fluid flow will be lost. Further, the range of strike is reduced when wider spacing is used. For example, when 800 m line spacing is used for seismic interpretation, the range of fault strike in the North only varies over 20 degrees, from 330 to 350 degrees, and the range in fault strike is predominantly 10 degrees in the South, from 000 to 010 degrees. Conversely, when every line is used for seismic interpretation, the range of fault strike in the North varies over 40 degrees, from 320 to 360 degrees, and the range in fault strike varies over 30 degrees in the South, from 355 to 025 degrees (Figure 9C vs Figure 9A). This decrease in strike range may limit the interpretation of fault growth, as the difference in fault strike is less pronounced when a wider spacing is used for seismic interpretation.

To assess the influence of fault segmentation on fault strike, we have highlighted the location of interpreted seismic-scale fault segmentation, using T-D plots, on the fault surfaces showing strike attribute (Figure 9). We can see that when a fault surface is picked using every line, a highly irregular surface is created with highly variable orientations, and not every observed corrugation correlate with <sup>a displacement minimum on</sup> fault segmentation identified using the throw profile (Figure 9A). Conversely, when a fault surface is picked using 800 m line spacing, the surface becomes overly smoothed, where no corrugations are shown where fault segmentation is identified in the T-D plot. However, when every 100 m line spacing is used for fault picking, it appears that the majority of fault segments are also identified by fault corrugations, particularly within the northern part of the fault (Figure 9B). However, some picked segmentations using T-D plots are not identified using corrugations, likely because not all areas of fault linkage cause a change in fault strike. Further, towards the southern half of the fault, corrugations are observed that do not correlate with fault segments picked using T-D plots. While this may indicate that an overly irregular fault surface may have been created through human error or triangulation method, it may also highlight potential areas of fault segmentation that cannot be identified by using T-D plots alone.

(31) or areas where bends occur due to out-of-plane fault propagation?

#### 4.2 Shale Gouge Ratio Modelling

The calculated shale gouge ratio (SGR) is not observed to vary substantially with picking strategy (Figure 10A, B), even though substantial changes to the fault throw along strike are observed (Figure 10E), associated with differences in picking strategies (as described above). Hence, the predicted shale content within the fault does not appear to vary significantly due to picking strategy. The shale content when a 25 m line spacing is used is estimated to be around 40-50% SGR (high SGR values) within the Sognefjord Formation in the footwall (Figure 10A). The same SGR values are also calculated when the fault segments and polygons are picked using every 800 m line spacing, despite large areas of drag being missed (Figure 10B).

(32) but which level on the strike proj. in Fig. 9 does the TD plot come from? The black dashed lines between the two do not

always line up with the corrugations

(33) RE: comparative T-L plots, shouldn't there be positions where the throw is exactly the same, regardless of picking strategy? For example, every 32<sup>nd</sup> 25 m x-section should fall on a 800 m-spacing section?

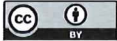

(34) where is '0.4' on Fig. 10D? Values < 40%? There are almost no values less than 40% on the X axis. I'm a little lost

355 When we examine the frequency of SGR values across the entire fault surface we can observe that there are only minor discrepancies between using a 25 m and 800 m spacing picking strategy (Figure 10C). However, when we take a closer look at the frequency of SGR values where only the Sognefjord Formation is juxtaposed in the footwall, and only those values where low VShale (<0.4) are juxtaposed (i.e. at sand-sand juxtapositions), we can see slight differences between the picking strategies. When every 800 m is picked, the overall calculated SGR is higher at these localities. Using a coarser picking  
360 strategy could, therefore, lead to an overestimated shale content, when in fact the shale content may be less, since the calculated SGR is lower when 25 m line spacing is used for polygon modelling, taking into consideration all areas of drag (Figure 10D).

### 4.3 Geomechanical Modelling

365 Although the predicted fault stability is influenced by external factors, specifically the *in situ* stress conditions, it is also heavily influenced by intrinsic fault attributes, namely strike and dip. Since the stress conditions used in this study are isotropic, fault dip has a primary control on fault stability over fault strike. Here, we show how fault dip, and hence geomechanical analysis, varies with picking strategy.

#### 4.3.1. Dip

370 Fault dip varies down the VFZ. There is low fault dip within the top 1000 m, particularly in the Northern section, where the fault penetrates younger stratigraphy, specifically the Cromer Knoll and the Shetland Groups. Here, the dip decreases to approximately 35 degrees, but can be as low as 15 degrees at the very top of the fault (Figure 11). The fault then steepens in dip to approximately 70 degrees at 1500 – 4000 m depth, beyond which the dip decreases again to approximately 40 degrees at the base of the fault.

375 Similar to fault strike, fault dip also varies according to picking strategies. The shallowly dipping portion at the top of the fault is smoothed with increasing picking distance, such that the lowest dip for faults picked on every 400 m and 800 m line spacing is 35 degrees. However, the shallowest dip for faults picked on every 25 m and 50 m line spacing is 15 degrees. Further, small, bulls-eye areas of steeper dip are also removed and smoothed when picking strategy is increased (Figure 11, red circles). Similarly, the steeper portion of the fault is smoothed as the line spacing used for picking is increased. This decreases the  
380 range of dips, and smooths any bulls-eye patches of steeper or shallower dip (Figure 11, black circles).

Although rigorous quality control has been performed to improve continuity between each inline, there remains several places where slight differences in picking has occurred between lines. This human error leads to an increased irregularity of the fault surface, often creating these bulls-eye areas of inconsistent dip, associated with the triangulation algorithm trying to honour each point along the fault segments. Since fault stability is influenced by fault dip, these areas will be brought through to  
385 geomechanical modelling. The uneven nature of the fault surface is most severe when every inline line has been picked on (e.g. Figures 11A and 12). The irregularity decreases with increased picking spacing.

(35) can you give a sense as to how big these patches are and, critically, how they vary / are distributed at and above the critical Sogne Fm. level?

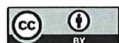

### 4.3.2 Fault Stability

Since dip varies with picking strategy, as does the predicted fault stability (Figure 12). Along fault-strike there are minor patches where the fault is predicted to be more stable (i.e. low dilation tendency and slip tendency values, or high fracture stability values) than the surrounding values, and patches where the fault is predicted to be less stable. These patches are most apparent when every line is picked on, with irregularity decreasing in severity until every 100 m to 200 m line spacing is used for picking, where the frequency of these irregular patches is reduced. Since the fault surface is smoothed with greater picking spacing (i.e. >200 m line spacing), the results for fault stability are also smoothed, reducing the range of values of the stability for each algorithms used (e.g. Dilation Tendency; Figure 13). Hence, interpretation of fault stability (in this case dilation tendency, slip tendency and fracture stability) will vary with picking strategy, and may in fact lead to incorrect fault stability assumptions. For example, areas where the fault is close to failure are only observed when a narrower picking strategy is used (Figures 12, 13). These areas are smoothed out and not visible when a coarser picking strategy is used. However, if these areas are not a product of human error or triangulation method, the overall stability would be overestimated within this location. Patches of differing predicted fault stability could be a produce of human error and/or triangulation method, but may also in fact be geologically plausible due to the inherent irregularity of faults in nature. Therefore, a question is presented regarding optimum picking strategy that retains sufficient detail but remove any data that is caused by human error and/or triangulation method. We propose this is achieved through picking every 100 m line spacing. Picking strategy influences the overall interpretation of dilation tendency, fracture stability and slip tendency, and all three stability algorithms vary with picking strategy (Figure 12). Note that the pore pressure values predicted for fracture stability are simply used as an indication for which areas on the fault are more/less stable, rather than to be taken as accurate pressure values that will cause the fault to reactivate. Fault stability varies along fault-strike and down fault-dip, associated with varying dip attribute values (as previously described in section 4.3.1). At the top of the fault, dilation tendency and slip tendency decrease with increasing picking spacing, leading to the interpretation of a more stable fault with a coarser picking strategy. At deeper levels on the fault, patches of more stable fault are removed with a coarser picking strategy (low dilation tendency and slip tendency values). However, the overall stability of the fault is increased as the range of dilation tendency and slip tendency values are reduced to lower average values, with unstable areas removed when a coarser picking strategy is used (Figures 12, 13). This pattern is also observed for fracture stability, where a predicted higher overall pore pressure is required to cause the fault to fail, despite patches of high fracture stability being removed with a coarser picking strategy. We can observe that when every line is used for picking (25 m spacing), a large portion of the fault is in failure (i.e. the dilation tendency is over 1; Figure 13). However, the dilation tendency is reduced as the line spacing is increased. The smoothing of the fault when every 32<sup>nd</sup> line is used for fault picking is reflected in the narrower range in predicted dilation tendency values (Figure 13). A similar finding has also been recorded by Tao and Alves (2019), where the stability of the fault increases when using coarser picking strategies.

(36) Why do you propose this? What do you not believe, geologically speaking, at <100m?

(37) all a little "wordy". The writing could be a little less complex + confusing, perhaps by removing big terms "dilation + slip tendency" where they're not absolutely critical. ← is this missing from the reference list?

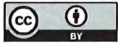

420

## 5. Discussion

Several studies have outlined how fault interpretation is conducted in the subsurface using 2D and 3D seismic, specifically through fault picking, (surface creation through to polygon, horizon-fault cutoffs picking) (e.g. Badley, 1985; Boulton and Freeman, 2007; Krantz and Neely, 2016; Yielding and Freeman, 2016). This methodology is crucial for several fault analyses, specifically, fault growth, fault seal and geomechanical analyses. However, a key step in the methodology appears to be omitted: how does the data sampling strategy, i.e. the spacing of lines for interpretation, impact these analyses? Up until recently, no papers have documented any optimum sampling strategies for fault interpretation in order to make sure all fault details have been captured at an ideal resolution (Tao and Alves, 2019). Tao and Alves (2019) documented an optimum Sampling Interval/Fault length ratio ( $\delta$ ) parameter, where the longer the fault, a shorter sampling distance is required. A  $\delta$  of 0.03 is suggested for faults that are over 3.5 km in length (as is in this case example), i.e. measurements at <3% of the fault length are the minimum required to assess fault segmentation in a reliable way. If the extents of GN1101 only are used (with an approximate fault length of 14 km), noting that the fault is in fact much larger than the extents of this survey, then a sampling interval of a minimum of 420 m would be required. In terms of line sampling, this would require interpretation on a minimum of every 16.8 lines. This sampling interval would in fact be much higher if the entire length of the fault is used (approximately

50 km) advocating for up to 1500 m spacing (every 60 lines). However, neither of the suggested line spacings would be sufficient to capture all details within this study, as shown by the overly smoothed fault surface and T-D plots when using either 16 or 32 line spacing, which do not capture any of the inherent irregularity or segmentation that occurs along the fault. Instead, a significantly narrower line space is required to capture all detail for fault growth modelling (100 m line spacing, correlating to a  $\delta$  of 0.007 if the extents of the survey is used, or 0.002 if the entire fault trace length is used), and for shale gouge ratio predictions (25 m line spacing) (Table 2). Despite little difference in predicted SGR between 25 m and 800 m picking spacing, details incorporating drag into fault seal analysis (that is missed with coarser spacing) is required. In order to ensure all geological irregularities are captured, the finest seismic resolution line spacing is suggested to be used for fault seal analysis.

We show how different results, and hence interpretation, of fault growth, fault stability and fault seal can occur through different picking strategies. Picking faults at increased spacing smooths the fault surface, potentially leading to areas of missed relict breached relays, as well as areas along the fault that might be more prone to up-fault fluid flow through fault reactivation. Smoothing is further exaggerated when fault polygon picking is also performed using wide line spacing, regardless of using the same seismic slicing techniques. Picked hanging wall polygons using wide line spacing miss important areas, such as drag, for both displacement analysis, but also potentially for fault seal analysis. Any areas where drag is not identified through chosen picking strategy could alter the juxtaposition, and hence may lead to incorrect interpretation of the sealing potential of faults. Hence, it is assumed that fault seal analysis and displacement analysis is most accurate when every line is used for

grammatically this is rather hard to understand

eg rubble  
then "lines"  
can you  
slide with  
the distance  
used  
440  
elsewhere  
throughout  
the paper?  
eg 25m,  
100m, etc

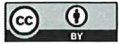

455 polygon picking. On the contrary, when fault segments are picked using every crossing line, a combination of human error and/or triangulation method lead to an irregular fault surface with bulls-eye areas of differing fault attribute values. This, therefore, leads to potential interpretation inaccuracies when fault stability analysis is performed. Suggesting an accurate picking strategy is, therefore, a balance between smoothing the fault surface to remove irregularities caused by human error, and incorporating geological irregularities, for the most accurate fault analyses to be performed in the shortest amount of time invested. It is important to consider further smoothing caused by seismic resolution, since seismic data cannot capture all irregularities within a fault zone such as jogs and asperities. Smoothing is also ingrained in the chosen triangulation method for fault surface creation (Figure 1).

460 Furthermore, it is assumed in Tao and Alves, (2019) that every line spacing is the most accurate, particularly for any geomechanical analysis. Although this may be true for picking fault polygons, it is likely to hinge on the limit of seismic resolution. Further, this might not be the case when picking fault segments to create triangulated fault surfaces. Fault picking using every line often leads to an overly irregular fault surface. It could be questioned whether this irregular surface is in fact geologically reasonable, or whether it is an artifact of picking, caused by human error, triangulation method and/or seismic resolution. Faults observed in the field are often recorded as highly irregular, particular in mechanically heterogeneous successions, with asperities observed along strike and down dip (e.g. Peacock and Xing, 1994; Childs et al., 1997). However, the imprecise nature of human picking from one line to the next often created severely uneven fault surfaces, despite rigorous QC-ing (Figure 14). We can see that the most irregular surface is created when every line is picked on. The smoothing increases as spacing increases. Hence, we suggest a narrower spacing for fault segment picking, of 100 m (every 4<sup>th</sup> line in this example), to most accurately capture fault surface detail for all fault analyses, but smooths any severe irregularities between interpreted segments. Three factors are guiding this recommendation: time invested versus details captured and avoiding noise (irregularity) from individual fault segments (Figure 14, Table 2). Note, however that this suggested line spacing is specific to this case study, and is likely to be different for varying sized faults, different tectonic regimes, fault complexity, seismic resolution etc. Further, the suggested line spacing is for inlines only that are roughly perpendicular to fault strike. While the use of interpreted cross-lines may add further irregularity where the faults are oriented parallel to the cross-line orientation, due to high ambiguity of the precise fault location, along with inlines and cross-lines not tying precisely (as is the case for this study), in other cases the use of cross-lines as well as inlines may prove useful. In particular, cases such as faults that are oblique to survey orientation, surveys with wide line spacing or those with poor seismic resolution may benefit from interpretation on cross-lines. Hence, continued analysis is required to assess picking strategy using both inlines and cross-lines for minor faults that are oblique to the survey orientation.

470  
475  
480

In order to address any uncertainty created by human error, we show how fault picking varies from one person to the next by using the same fault, picked on a 50 m line spacing by two separate experienced interpreters (Figure 15). The example shown here uses geomechanical analysis (dilation tendency) only, without the added complexity of fault polygon picking. The overall location of fault segments is approximately the same, with the exception of the vertical extents varying slightly. Further, on some lines, the fault picking is almost identical between the two interpreters (Figure 15E, F). However, subtle variations in

(39) what do you mean by this?

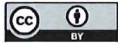

picking techniques are observed. For example, where ambiguity exists due to poor seismic resolution at the fault, combined with a wide fault zone composed of multiple slip surfaces (Figure 15C), uncertainty ensues when interpreting the precise location of the fault surface. In this example, interpreter one has chosen to pick on the hanging wall side of the fault, whereas interpreter two has chosen to pick the fault further into the footwall of the entire fault zone (Figure 15D). This has also been documented in Faleide et al. (2020; in review), where several interpreters choose different locations to pick the fault: on the footwall, on hanging wall side, or within the middle of the fault zone. Variations in the location of fault picks at depth are also observed, caused by poorer seismic resolution at depth, increasing uncertainty when picking the precise fault location. It is these subtle variations in fault segment picking that can cause important variations in the resulting fault attributes. For example, when we examine the dilation tendency on the triangulated fault surfaces, we can see distinct differences that lead to overall changes in fault stability interpretation. Picking the fault segment on the hanging wall side by interpreter one has created a fault surface that is closer to failure than interpreter two, due to resulting variations in fault dip. Due to the vertical extents varying, interpreter two has a more stable area towards the top of the whole fault, whereas only the Northern most area on interpreter one's fault is more stable towards the top of the fault. Overall, interpreter one has generated a fault surface that is less stable than interpreter two. Although knowing the precise location of the fault in the subsurface is impossible, it is important to understand how, and to what extent, these slight discrepancies may influence the fault analysis, and hence the feasibility of a CO<sub>2</sub> storage site.

To assess the effects of triangulation method on fault analysis, we have shown how the fault dip attribute varies with different triangulation methods (Figure 16). In this example, we have used fault segments picked on every line to examine different triangulation methods. We can see that the dip varies substantially between each triangulation method, particularly when equant triangles that are larger in size (i.e. 400 m) are used. This triangulation method essentially smooths any irregularities. Conversely, areas of irregularities are increased when equant triangles of a smaller size (i.e. 25 m, matching the line spacing) are used. A highly irregular fault surface is produced when constrained triangulation method is used, as the surface conforms to each node and lines between adjacent nodes. It is important to consider how triangulation method influences fault attributes, since each triangulation method creates different surfaces. Hence, not only will fault stability analysis vary with picking strategy, but it will also vary with triangulation method chosen. Further, any additional smoothing (as is common in several software packages) will miss any picked irregularity and may lead to incorrect analyses. Caution is therefore required when creating fault surfaces, particularly where automatic smoothing is applied.

As per any interpretation limitations, the seismic quality may vary due to seismic processing, detection limits and resolution, which will impact the resulting fault analyses (Herron, 2011; Alcalde et al., 2017; Faleide et al., 2020; in review). Hence, the suggestions of optimal interpretation techniques described within this paper are likely to not always be applicable to other seismic studies. For example, poorer quality seismic may in fact require closer spaced interpretation. Moreover, these picking strategy suggestions depend on what type of analysis is required, and what the overall stratigraphic and structural complexities are. Where increased structural and stratigraphic complexities exist, it is likely that a decreased line spacing is required compared to areas that are less complex.



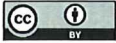

520 Further to the implications of human error, triangulation method and seismic quality, another important consideration when  
interpreting faults, and what risks and uncertainties are created from the picking strategies, is the time spent picking each fault  
segment. The amount of time invested in picking each fault segment alters the interpretation and level of irregularity. In a  
time when tight deadlines are imposed, it is easy to interpret quickly, without rigorous QC'ing. This will add another level of  
uncertainty and inaccuracy to any fault analysis performed. This is shown in Figure 17, where the interpretation varies  
525 depending on the time given to perform the interpretation. Unsurprisingly, more detail is added when extra time is available  
for interpretation, with fewer mistakes made.

(40) Isn't this rather obvious, given fault throw is  
large, CO<sub>2</sub> reservoir thin, + muddy units abundant?  
5.1 Implications of Picking Strategy on CO<sub>2</sub> Storage

v. good general points

I guess I wouldn't have brought  
picking strategy would inf. the fact high SGR is seen

530 Surprisingly, the predicted shale content of the fault is not shown to vary substantially with picking strategy within this  
example, when the entire fault is analysed (Figure 10A, B & C), despite significant differences in the picked polygons.  
Whether the fault polygons are picked every line or every 32<sup>nd</sup> line, the SGR calculated remains high. Hence, there is a high  
fault seal potential, which is likely to retain injected CO<sub>2</sub> within the Smeaheia site, regardless of how the fault polygons have  
been picked. However, this could be a product of both the size of the fault, as well as the VShale curve. The high proportion  
of shale within the sequence means that the shale gouge ratio remains high, regardless of any variations in polygon location. Exactly!

535 Further, since the throw of the fault reaches up to 1 km, particularly where significant drag is observed (at the Northern-most  
end of the fault), any variations in the size of these drag zones may not influence the juxtaposition sufficiently to alter any fault  
seal potential. However, some subtle variations in SGR calculated at low VShale overlaps (sand-sand juxtapositions) at 4  
locations where the Sognefjord Formation is in the footwall, is recorded with picking strategy (Figure 10D). Higher SGR  
calculated using wider picking spacing could be associated with an increased displacement, due to the areas of drag either  
540 being missed or having a lower amplitude. It is important to note that this is one example of how fault seal potential may vary  
with picking strategy, and in other examples any differences in calculated SGR may have a more significant impact the  
feasibility of the CO<sub>2</sub> storage site. For example, areas where drag occurs on small displacement faults, but are missed due to  
picking strategy, may alter the fault seal potential more significantly in different scenarios. Moreover, different VShale curves,  
such as containing a sandier sequence, or contains more substantial differences in values between horizons, may cause  
545 significant differences in SGR values with different picking strategy. Hence, no conclusive recommendations for the most  
accurate picking strategy for fault seal analysis is made using this example. However, picking on every line will capture any  
and all seismically resolvable variations along the fault.

Reliable risking of faults for CO<sub>2</sub> storage relies on the accuracy of the input parameters. This may mean the VShale curve for  
fault seal analysis (as described above) and accurately capturing the *in situ* stresses for fault reactivation analysis. More often  
550 than not, the picking strategy is overlooked when performing these analyses. However, as we have shown here, the method  
used for fault picking is crucial for critically analyzing the likelihood of fault reactivation upon CO<sub>2</sub> injection. The assessment  
for where a fault is critically stressed or more stable is observed to vary substantially as the picking strategy changes.

v. reasonable  
and well-  
expressed  
conclusion

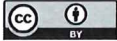

Although the likelihood of whether the predicted fault stability for the Smeaheia site is correct, based on accuracy of the input parameters (*in situ* stress and fault rock cohesion and frictional coefficient) is not fully discussed within this paper, it is important to note that whether the fault may be reactivated upon CO<sub>2</sub> injection will be influenced by these factors. For the sake of simplicity, we have used one stress scenario and one fault rock property scenario, in order to assess how fault stability simply varies with picking strategy. However, it is important to note that the fault rock properties chosen for this study is using previously documented frictional coefficient and cohesion based on estimated clay content in the fault (Meng et al., 2016), rather than measured values. The fault may in fact have higher or lower cohesion and frictional coefficient, due to variations in clay content, clay types, along with any cataclasis that is likely to have occurred within the high porosity sandstone of the Sognefjord Formation. Changing the cohesion and frictional coefficient will alter the predicted pressure that may cause the fault to fail. Hence, the pressure values within this paper are to be used indicatively for areas of that are more or less likely to fail.

We can observe that the predicted SGR values, and hence sealing potential of the fault, is high, reducing the risk for CO<sub>2</sub> storage regardless of picking strategy used. Conversely, the likelihood of the fault to reactivate is also high, increasing the risk for CO<sub>2</sub> storage. However, the variations to the fault reactivation potential dependent on picking strategy are significant, causing uncertainties to this analysis. When we use our suggested optimum picking strategy of 100 m (every 4<sup>th</sup> line) we can see patches of the fault where the risk of reactivation is low, but also contains areas where the fault is close to failure (Figures 12 and 13). Hence, under these limited modelled scenarios, there is a high likelihood for the fault to reactivate upon CO<sub>2</sub> injection.

## 6. Summary

What line spacing is chosen to pick both the fault segments and fault polygons will influence the analysis performed on the faults, with the results varying with picking strategy. We can observe that using a wider line spacing:

- Underestimates fault segmentation
- Causes inaccurate interpretation of the location of fault segments
- Overestimates the fault sealing potential in this example
- Smooths the fault such that subtle variations in dip and strike are not obvious
- Predicts an overall more stable fault in this example

Through observations regarding fault growth analysis, we show that the optimum picking strategy for this example is using every 4<sup>th</sup> line spacing (100 m). This picking strategy not only identifies all fault segments that are observed using every line, but also smooths the fault such that any irregularities caused by human error and triangulation method is removed, but retains detail for accurate geomechanical analysis. While using every 4<sup>th</sup> line spacing for fault segmentation and fault polygon picking is suitable for fault growth modelling and geomechanical modelling, a different approach may be required for detailed fault

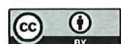

seal analysis. Although the overall SGR is very similar when picking on every line vs picking on every 32<sup>nd</sup> line, subtle variations, that may be critical in other examples, are observed. Specifically an overestimate of the SGR is recorded when a wider picking strategy is used. Hence, picking fault polygons using every line spacing is suggested as this strategy will capture all geological irregularities important for fault seal.

590

#### Author Contribution

EAHM designed the methodology for the investigation, along with AB. EAHM carried out the investigation, with help from MJM. EAHM prepared the manuscript and figures with scientific input, discussions and proofing from all co-authors. AB provided funding for the research.

#### 595 Acknowledgements

This is a contribution of the FRISK project, supported by the Research Council of Norway (RCN# 295061). Support from the NCCS Centre is acknowledged, performed under the Norwegian research program Centres for Environment-friendly Energy Research (FME). The authors acknowledge the following partners for their contributions: Aker Solutions, Ansaldo Energia, CoorsTek Membrane Sciences, EMGS, Equinor, Gassco, Krohne, Larvik Shipping, Lundin, Norcem, Norwegian Oil and Gas, 600 Quad Geometrics, Total, Vår Energi, and the Research Council of Norway (RCN# 257579/E20). Badley Geoscience Ltd. are thanked for their academic license of T7. Warm thanks are given to Peter Bretan and Andrew Foster for their software support.

#### References

- Alcalde, J., Bond, C.E., Johnson, G., Ellis, J.F. and Butler, R.W., 2017. Impact of seismic image quality on fault interpretation 605 uncertainty. *GSA Today*.
- Allan, U.S., 1989. Model for hydrocarbon migration and entrapment within faulted structures. *AAPG bulletin*, 73(7), pp.803-811.
- Andrews, J.S., Fintland, T.G., Helstrup, O.A., Horsrud, P. and Raaen, A.M., 2016, June. Use of unique database of good quality stress data to investigate theories of fracture initiation, fracture propagation and the stress state in the subsurface. In *50th 610 US Rock Mechanics/Geomechanics Symposium*. American Rock Mechanics Association.
- Araya-Polo, M., Dahlke, T., Frogner, C., Zhang, C., Poggio, T. and Hohl, D., 2017. Automated fault detection without seismic processing. *The Leading Edge*, 36(3), pp.208-214.

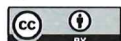

- Avseth, P., Mukerji, T. and Mavko, G., 2010. *Quantitative seismic interpretation: Applying rock physics tools to reduce interpretation risk*. Cambridge university press.
- 615 Aydin, A. and Eyal, Y., 2002. Anatomy of a normal fault with shale smear: implications for fault seal. *AAPG bulletin*, 86(8), pp.1367-1381.
- Badley, M.E., 1985. *Practical seismic interpretation*.
- Badley, M.E., Price, J.D., Dahl, C.R. and Agdestein, T., 1988. The structural evolution of the northern Viking Graben and its bearing upon extensional modes of basin formation. *Journal of the Geological Society*, 145(3), pp.455-472.
- 620 Barton, C.A., Zoback, M.D. and Moos, D., 1995. Fluid flow along potentially active faults in crystalline rock. *Geology*, 23(8), pp.683-686.
- Bell, R.E., Jackson, C.L., Elliott, G.M., Gawthorpe, R.L., Sharp, I.R. and Michelsen, L., 2014. Insights into the development of major rift-related unconformities from geologically constrained subsidence modelling: Halten Terrace, offshore mid Norway. *Basin Research*, 26(1), pp.203-224.
- 625 Benedicto, A., Schultz, R.A. and Soliva, R., 2003. Layer thickness and the shape of faults. *Geophysical Research Letters*, 30(20).
- Bense, V.F. and Van Balen, R., 2004. The effect of fault relay and clay smearing on groundwater flow patterns in the Lower Rhine Embayment. *Basin Research*, 16(3), pp.397-411.
- Birol, F., 2008. World energy outlook. *Paris: International Energy Agency*, 23(4), p.329.
- 630 Boulton, P. and Freeman, B., 2007. Using faults as an aid to horizon mapping in areas of poor 2D seismic: Otway Basin example. *MESA Journal*, 46, pp.4-9.
- Bretan, P., Yielding, G., Mathiassen, O.M. and Thorsnes, T., 2011. Fault-seal analysis for CO<sub>2</sub> storage: an example from the Troll area, Norwegian Continental Shelf. *Petroleum Geoscience*, 17(2), pp.181-192.
- Brudy, M. and Kjørholt, H., 2001. Stress orientation on the Norwegian continental shelf derived from borehole failures observed in high-resolution borehole imaging logs. *Tectonophysics*, 337(1-2), pp.65-84.
- 635 Cartwright, J.A., Trudgill, B.D. and Mansfield, C.S., 1995. Fault growth by segment linkage: an explanation for scatter in maximum displacement and trace length data from the Canyonlands Grabens of SE Utah. *Journal of Structural Geology*, 17(9), pp.1319-1326.
- Cartwright, J.A., Mansfield, C. and Trudgill, B., 1996. The growth of normal faults by segment linkage. *Geological Society, London, Special Publications*, 99(1), pp.163-177.
- 640 Chiaramonte, L., Zoback, M.D., Friedmann, J. and Stamp, V., 2008. Seal integrity and feasibility of CO<sub>2</sub> sequestration in the Teapot Dome EOR pilot: geomechanical site characterization. *Environmental Geology*, 54(8), pp.1667-1675.
- Childs, C., Watterson, J. and Walsh, J.J., 1995. Fault overlap zones within developing normal fault systems. *Journal of the Geological Society*, 152(3), pp.535-549.
- 645 Childs, C., Walsh, J.J. and Watterson, J., 1997. Complexity in fault zone structure and implications for fault seal prediction. In *Norwegian Petroleum Society Special Publications* (Vol. 7, pp. 61-72). Elsevier.

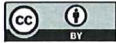

- Chiquet, P., Daridon, J.L., Broseta, D. and Thibeau, S., 2007. CO<sub>2</sub>/water interfacial tensions under pressure and temperature conditions of CO<sub>2</sub> geological storage. *Energy Conversion and Management*, 48(3), pp.736-744.
- 650 Cowie, P.A. and Scholz, C.H., 1992a. Displacement-length scaling relationship for faults: data synthesis and discussion. *Journal of Structural Geology*, 14(10), pp.1149-1156.
- Cowie, P.A. and Scholz, C.H., 1992b. Physical explanation for displacement-length relationship of faults using a post-yield fracture mechanics model. *Journal of Structural Geology*, 14, pp.1133-1133.
- Cowie, P.A., 1998. A healing–reloading feedback control on the growth rate of seismogenic faults. *Journal of Structural Geology*, 20(8), pp.1075-1087.
- 655 Daniel, R.F. and Kaldi, J.G., 2008. Evaluating seal capacity of caprocks and intraformational barriers for the geosequestration of CO<sub>2</sub>.
- Dawers, N.H. and Anders, M.H., 1995. Displacement-length scaling and fault linkage. *Journal of Structural Geology*, 17(5), pp.607-614.
- Deng, C., Fossen, H., Gawthorpe, R.L., Rotevatn, A., Jackson, C.A. and FazliKhani, H., 2017. Influence of fault reactivation during multiphase rifting: The Oseberg area, northern North Sea rift. *Marine and Petroleum Geology*, 86, pp.1252-1272.
- 660 Dreyer, T., Whitaker, M., Dexter, J., Flesche, H. and Larsen, E., 2005, January. From spit system to tide-dominated delta: integrated reservoir model of the Upper Jurassic Sognefjord Formation on the Troll West Field. In *Geological Society, London, Petroleum Geology Conference series* (Vol. 6, No. 1, pp. 423-448). Geological Society of London.
- Duffy, O.B., Bell, R.E., Jackson, C.A.L., Gawthorpe, R.L. and Whipp, P.S., 2015. Fault growth and interactions in a multiphase rift fault network: Horda Platform, Norwegian North Sea. *Journal of Structural Geology*, 80, pp.99-119.
- 665 International Energy Agency and Birol, F., 2013. *World energy outlook 2013*. Paris: International Energy Agency.
- EU Commission, 2018. Communication from the commission to the European parliament, the European Council, the Council, the European economic and social committee, the committee of the regions and the European investment bank, in: A Clean Planet for All. A European Strategic Long-Term Vision for a Prosperous, Modern, Competitive and Climate Neutral Economy.
- 670 Brussels.
- Faleide, T. S., Braathen, A., Lecomte, I., Mulrooney, M. J., Anell, I., Midtkandal, I. and Planke, S., 2020. Testing Seismic Interpretations of Faults by Modelling: Viable Geometries versus Seismic Resolution in the Subsurface. In 82nd EAGE Annual Conference & Exhibition 1, 1-5.
- Faleide, T. S., Braathen, A., Lecomte, I., Mulrooney, M. J., Midtkandal, I., Bugge, A. J. & Planke, S., In Review. Exploring extensional fault interpretations from seismic reflection data of various resolution substantiated by seismic modelling. *journal?*
- 675 Færseth, R.B., Gabrielsen, R.H. and Hurich, C.A., 1995. Influence of basement in structuring of the North Sea basin, offshore southwest Norway. *Norsk Geologisk Tidsskrift*, 75(2-3), pp.105-119.
- Færseth, R.B., 1996. Interaction of Permo-Triassic and Jurassic extensional fault-blocks during the development of the northern North Sea. *Journal of the Geological Society*, 153(6), pp.931-944.

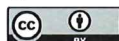

- 680 Færseth, R.B., 2006. Shale smear along large faults: continuity of smear and the fault seal capacity. *Journal of the Geological Society*, 163(5), pp.741-751.
- Ferrill, D.A., Winterle, J., Wittmeyer, G., Sims, D., Colton, S., Armstrong, A. and Morris, A.P., 1999a. Stressed rock strains groundwater at Yucca Mountain, Nevada. *GSA Today*, 9(5), pp.1-8.
- Ferrill, D.A., Stamatakos, J.A. and Sims, D., 1999b. Normal fault corrugation: Implications for growth and seismicity of active  
685 normal faults. *Journal of Structural Geology*, 21(8-9), pp.1027-1038.
- Fisher, Q.J. and Knipe, R., 1998. Fault sealing processes in siliciclastic sediments. *Geological Society, London, Special Publications*, 147(1), pp.117-134.
- Foxford, K.A., Walsh, J.J., Watterson, J., Garden, I.R., Guscott, S.C. and Burley, S.D., 1998. Structure and content of the  
690 Moab Fault Zone, Utah, USA, and its implications for fault seal prediction. *Geological Society, London, Special Publications*, 147(1), pp.87-103.
- Fristad, T., Groth, A., Yielding, G. and Freeman, B., 1997. Quantitative fault seal prediction: a case study from Oseberg Syd. In *Norwegian Petroleum Society Special Publications* (Vol. 7, pp. 107-124). Elsevier.
- Fulljames, J.R., Zijerveld, L.J.J. and Franssen, R.C.M.W., 1997. Fault seal processes: systematic analysis of fault seals over geological and production time scales. In *Norwegian Petroleum Society Special Publications* (Vol. 7, pp. 51-59). Elsevier.
- 695 Goldsmith, P.J., 2000. Exploration potential east of the Troll Field, offshore Norway, after dry well 32/4-1. In *Norwegian Petroleum Society Special Publications* (Vol. 9, pp. 65-97). Elsevier.
- Gradstein, F.M. and Waters, C.N., 2016. Stratigraphic Guide to the Cromer Knoll, Shetland and Chalk Groups, North Sea and Norwegian Sea. *Newsletters on Stratigraphy*, 49(1), pp.71-280.
- Halland, E.K., Johansen, W.T. and Riis, F., CO2 Storage Atlas: Norwegian North Sea, Norwegian Petroleum Directorate, PO  
700 Box 600, NO-4003 Stavanger, Norway, 2011. URL <http://www.npd.no/no/Publikasjoner/Rapporter/CO2-lagringsatlas>
- Herron, D.A., 2011. *First steps in seismic interpretation*. Society of Exploration Geophysicists.
- Hillis, R.R. and Nelson, E.J., 2005, January. In situ stresses in the North Sea and their applications: Petroleum geomechanics from exploration to development. In *Geological Society, London, Petroleum Geology Conference series* (Vol. 6, No. 1, pp. 551-564). Geological Society of London.
- 705 Holgate, N.E., Jackson, C.A.L., Hampson, G.J. and Dreyer, T., 2013. Sedimentology and sequence stratigraphy of the middle–upper jurassic krossfjord and fensfjord formations, Troll Field, northern North Sea. *Petroleum Geoscience*, 19(3), pp.237-258.
- Huggins, P., Watterson, J., Walsh, J.J. and Childs, C., 1995. Relay zone geometry and displacement transfer between normal faults recorded in coal-mine plans. *Journal of Structural Geology*, 17(12), pp.1741-1755.
- Intergovernmental Panel on Climate Change, 2014: *Climate Change 2014: Synthesis Report. Contribution of Working Groups I, II and III to the Fifth Assessment Report of the Intergovernmental Panel on Climate Change* [Core Writing Team, R.K. Pachauri and L.A. Meyer (eds.)]. IPCC, Geneva, Switzerland, 151 pp.
- 710 Intergovernmental Panel on Climate Change, 2018. Special Report. Global Warming of 1.5°C.

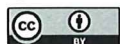

- Isaksen, G.H. and Ledje, K.H.I., 2001. Source rock quality and hydrocarbon migration pathways within the greater Utsira High area, Viking Graben, Norwegian North Sea. *AAPG bulletin*, 85(5), pp.861-883.
- 715 Jackson, C.A.L. and Rotevatn, A., 2013. 3D seismic analysis of the structure and evolution of a salt-influenced normal fault zone: a test of competing fault growth models. *Journal of Structural Geology*, 54, pp.215-234.
- Jackson, C.A.L., Bell, R.E., Rotevatn, A. and Tvedt, A.B., 2017. Techniques to determine the kinematics of synsedimentary normal faults and implications for fault growth models. *Geological Society, London, Special Publications*, 439(1), pp.187-217.
- 720 Jennings, J.B., 1987. Capillary pressure techniques: application to exploration and development geology. *AAPG Bulletin*, 71(10), pp.1196-1209.
- Justwan, H. and Dahl, B., 2005, January. Quantitative hydrocarbon potential mapping and organofacies study in the Greater Balder Area, Norwegian North Sea. In *Geological Society, London, Petroleum Geology Conference series* (Vol. 6, No. 1, pp. 1317-1329). Geological Society of London.
- 725 Karolytė, R., Johnson, G., Yielding, G. and Gilfillan, S.M., 2020. Fault seal modelling—the influence of fluid properties on fault sealing capacity in hydrocarbon and CO<sub>2</sub> systems. *Petroleum Geoscience*.
- Kim, Y.S. and Sanderson, D.J., 2005. The relationship between displacement and length of faults: a review. *Earth-Science Reviews*, 68(3-4), pp.317-334.
- Knipe, R.J., 1992. Faulting processes and fault seal. In *Structural and tectonic modelling and its application to petroleum geology* (pp. 325-342). Elsevier.
- 730 Knipe, R.J., Fisher, Q.J., Jones, G., Clennell, M.R., Farmer, A.B., Harrison, A., Kidd, B., McAllister, E.R.P.J., Porter, J.R. and White, E.A., 1997. Fault seal analysis: successful methodologies, application and future directions. In *Norwegian Petroleum Society Special Publications* (Vol. 7, pp. 15-38). Elsevier.
- Krantz, B. and Neely, T., 2016. Subsurface structural interpretation: The significance of 3-D structural frameworks. In: B. Krantz, C. Ormand, & B. Freeman, eds, 3-D structural interpretation: Earth, mind, and machine: AAPG Memoir 111, p. 155-171.
- 735 Krantz, C. Ormand, & B. Freeman, eds, 3-D structural interpretation: Earth, mind, and machine: AAPG Memoir 111, p. 155-171.
- Kyrkjebø, R., Gabrielsen, R.H. and Faleide, J.I., 2004. Unconformities related to the Jurassic–Cretaceous synrift–post-rift transition of the northern North Sea. *Journal of the Geological Society*, 161(1), pp.1-17.
- Lauritsen, H., Kassold, S., Meneguolo, R. and Furre, A., 2018, November. Assessing potential influence of nearby hydrocarbon production on CO<sub>2</sub> storage at Smeaheia. In *Fifth CO<sub>2</sub> Geological Storage Workshop* (Vol. 2018, No. 1, pp. 1-5). European Association of Geoscientists & Engineers.
- 740 Lauritsen, H., Kassold, S., Meneguolo, R. and Furre, A., 2018, November. Assessing potential influence of nearby hydrocarbon production on CO<sub>2</sub> storage at Smeaheia. In *Fifth CO<sub>2</sub> Geological Storage Workshop* (Vol. 2018, No. 1, pp. 1-5). European Association of Geoscientists & Engineers.
- Lindsay, N.G., Murphy, F.C., Walsh, J.J., Watterson, J., Flint, S. and Bryant, I., 1993. Outcrop studies of shale smears on fault surfaces. *The geological modelling of hydrocarbon reservoirs and outcrop analogues*, 15, pp.113-123.
- 745 Lothe, A.E., Bergmo, P.E. and Grimstad, A.A., 2019. Storage Resources for Future European CCS Deployment; A Roadmap for a Horda CO<sub>2</sub> Storage Hub, Offshore Norway.

Where was this published?

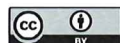

- Lyon, P.J., Boulton, P.J., Hillis, R.R. and Mildren, S.D., 2005. Sealing by shale gouge and subsequent seal breach by reactivation: A case study of the Zema Prospect, Otway Basin.
- Manzocchi, T., Childs, C. and Walsh, J.J., 2010. Faults and fault properties in hydrocarbon flow models. *Geofluids*, 10(1-2), pp.94-113.
- 750 Meng, L., Fu, X., Lv, Y., Li, X., Cheng, Y., Li, T. and Jin, Y., 2017. Risking fault reactivation induced by gas injection into depleted reservoirs based on the heterogeneity of geomechanical properties of fault zones. *Petroleum Geoscience*, 23(1), pp.29-38.
- Mildren, S.D., Hillis, R.R., Lyon, P.J., Meyer, J.J., Dewhurst, D.N. and Boulton, P.J., 2005. FAST: a new technique for geomechanical assessment of the risk of reactivation-related breach of fault seals.
- 755 Miodic, J., Johnson, G. and Bond, C.E., 2019. Uncertainty in fault seal parameters: implications for CO<sub>2</sub> column height retention and storage capacity in geological CO<sub>2</sub> storage projects. *Solid earth*.
- Mondol, N.H., Fawad, M. and Park, J., 2018, November. Petrophysical Analysis And Rock Physics Diagnostics Of Sognefjord Formation In The Smeaheia Area, Northern North Sea. In *Fifth CO<sub>2</sub> Geological Storage Workshop* (Vol. 2018, No. 1, pp. 1-5). European Association of Geoscientists & Engineers.
- 760 Morley, C.K., Nelson, R.A., Patton, T.L. and Munn, S.G., 1990. Transfer zones in the East African rift system and their relevance to hydrocarbon exploration in rifts. *AAPG bulletin*, 74(8), pp.1234-1253.
- Morley, C.K., 1999. Patterns of displacement along large normal faults: implications for basin evolution and fault propagation, based on examples from East Africa. *AAPG bulletin*, 83(4), pp.613-634.
- Morris, A., Ferrill, D.A. and Henderson, D.B., 1996. Slip-tendency analysis and fault reactivation. *Geology*, 24(3), pp.275-765 278.
- Mulrooney, M.J., Osmond, J.L., Skurtveit, E., Faleide, J.I. and Braathen, A., 2020. Structural analysis of the Smeaheia fault block, a potential CO<sub>2</sub> storage site, northern Horda Platform, North Sea. *Marine and Petroleum Geology*, p.104598.
- Nicol, A., Watterson, J., Walsh, J.J. and Childs, C., 1996. The shapes, major axis orientations and displacement patterns of fault surfaces. *Journal of Structural Geology*, 18(2-3), pp.235-248.
- 770 Nicol, A., Walsh, J., Berryman, K. and Nodder, S., 2005. Growth of a normal fault by the accumulation of slip over millions of years. *Journal of Structural Geology*, 27(2), pp.327-342.
- Nicol, A., Walsh, J.J., Villamor, P., Seebeck, H. and Berryman, K.R., 2010. Normal fault interactions, paleoearthquakes and growth in an active rift. *Journal of Structural Geology*, 32(8), pp.1101-1113.
- Nybakken, S. and Bäckström, S.A., 1989. Shetland Group: stratigraphic subdivision and regional correlation in the Norwegian North Sea. In *Correlation in Hydrocarbon Exploration* (pp. 253-269). Springer, Dordrecht.
- 775 Patruno, S., Hampson, G.J., Jackson, C.A.L. and Whipp, P.S., 2015. Quantitative progradation dynamics and stratigraphic architecture of ancient shallow-marine clinoform sets: a new method and its application to the Upper Jurassic Sognefjord Formation, Troll Field, offshore Norway. *Basin Research*, 27(4), pp.412-452.



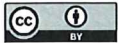

- Peacock, D.C.P. and Sanderson, D.J., 1991. Displacements, segment linkage and relay ramps in normal fault zones. *Journal of Structural Geology*, 13(6), pp.721-733.
- 780 Peacock, D.C.P. and Sanderson, D.J., 1994. Geometry and development of relay ramps in normal fault systems. *AAPG bulletin*, 78(2), pp.147-165.
- Peacock, D. C. P., & Xing, Z., 1994. Field examples and numerical modelling of oversteps and bends along normal faults in cross-section. *Tectonophysics*, 234(1-2), 147-167.
- 785 Rider, M., 2000. The geological interpretation of well logs second edition. *Rider–French Consulting Ltd, Sutherland, The United Kingdom*, pp.126-128.
- Ringrose, P.S., Thorsen, R., Zweigel, P., Nazarian, B., Furre, A.K., Paasch, B., Thompson, N. and Karstad, P.I., 2017, September. Ranking and Risking Alternative CO<sub>2</sub> Storage Sites Offshore Norway. In *Fourth Sustainable Earth Sciences Conference* (Vol. 2017, No. 1, pp. 1-5). European Association of Geoscientists & Engineers.
- 790 Rogelj, J., Den Elzen, M., Höhne, N., Fransen, T., Fekete, H., Winkler, H., Schaeffer, R., Sha, F., Riahi, K. and Meinshausen, M., 2016. Paris Agreement climate proposals need a boost to keep warming well below 2 C. *Nature*, 534(7609), pp.631-639.
- Rotevatn, A., Fossen, H., Hesthammer, J., Aas, T.E. and Howell, J.A., 2007. Are relay ramps conduits for fluid flow? Structural analysis of a relay ramp in Arches National Park, Utah. *Geological Society, London, Special Publications*, 270(1), pp.55-71.
- Rotevatn, A., Tveranger, J., Howell, J.A. and Fossen, H., 2009. Dynamic investigation of the effect of a relay ramp on  
795 simulated fluid flow: geocellular modelling of the Delicate Arch Ramp, Utah. *Petroleum Geoscience*, 15(1), pp.45-58.
- Rotevatn, A., Kristensen, T.B., Ksienzyk, A.K., Wemmer, K., Henstra, G.A., Midtkandal, I., Grundvåg, S.A. and Andresen, A., 2018. Structural inheritance and rapid rift-length establishment in a multiphase rift: The East Greenland rift system and its Caledonian orogenic ancestry. *Tectonics*, 37(6), pp.1858-1875.
- Rotevatn, A., Jackson, C.A.L., Tvedt, A.B., Bell, R.E. and Blækkan, I., 2019. How do normal faults grow?. *Journal of*  
800 *Structural Geology*, 125, pp.174-184.
- Rutqvist, J., Birkholzer, J., Cappa, F. and Tsang, C.F., 2007. Estimating maximum sustainable injection pressure during geological sequestration of CO<sub>2</sub> using coupled fluid flow and geomechanical fault-slip analysis. *Energy Conversion and Management*, 48(6), pp.1798-1807.
- Shipton, Z.K., Evans, J.P. and Thompson, L.B., 2005. The geometry and thickness of deformation-band fault core and its  
805 influence on sealing characteristics of deformation-band fault zones.
- Smith, D.A., 1980. Sealing and nonsealing faults in Louisiana Gulf Coast salt basin. *AAPG Bulletin*, 64(2), pp.145-172.
- Sperrevik, S., Gillespie, P.A., Fisher, Q.J., Halvorsen, T. and Knipe, R.J., 2002. Empirical estimation of fault rock properties. In *Norwegian Petroleum Society Special Publications* (Vol. 11, pp. 109-125). Elsevier.
- Statoil, 2016. Subsurface Evaluation of Smeaheia as part of 2016 Feasibility study on CO<sub>2</sub> storage in the Norwegian  
810 Continental Shelf. OED 15/1785. Document A – Underground report Smeaheia (Internal Report – Available on Request Only).

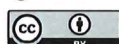

- Streit, J.E. and Hillis, R.R., 2004. Estimating fault stability and sustainable fluid pressures for underground storage of CO<sub>2</sub> in porous rock. *Energy*, 29(9-10), pp.1445-1456.
- Takahashi, M., 2003. Permeability change during experimental fault smearing. *Journal of Geophysical Research: Solid Earth*, 108(B5).  
815
- Torabi, A. and Berg, S.S., 2011. Scaling of fault attributes: A review. *Marine and Petroleum Geology*, 28(8), pp.1444-1460.
- Trudgill, B. and Cartwright, J., 1994. Relay-ramp forms and normal-fault linkages, Canyonlands National Park, Utah. *Geological Society of America Bulletin*, 106(9), pp.1143-1157.
- van der Zee, W. and Urai, J.L., 2005. Processes of normal fault evolution in a siliciclastic sequence: a case study from Miri, Sarawak, Malaysia. *Journal of Structural Geology*, 27(12), pp.2281-2300.  
820
- Walsh, J.J. and Watterson, J., 1988. Analysis of the relationship between displacements and dimensions of faults. *Journal of Structural geology*, 10(3), pp.239-247.
- Walsh, J.J. and Watterson, J., 1991. Geometric and kinematic coherence and scale effects in normal fault systems. *Geological Society, London, Special Publications*, 56(1), pp.193-203.
- 825 Walsh, J.J., Nicol, A. and Childs, C., 2002. An alternative model for the growth of faults. *Journal of Structural Geology*, 24(11), pp.1669-1675.
- Walsh, J.J., Bailey, W.R., Childs, C., Nicol, A. and Bonson, C.G., 2003. Formation of segmented normal faults: a 3-D perspective. *Journal of Structural Geology*, 25(8), pp.1251-1262.
- Watts, N.L., 1987. Theoretical aspects of cap-rock and fault seals for single-and two-phase hydrocarbon columns. *Marine and Petroleum Geology*, 4(4), pp.274-307.  
830
- Whipp, P.S., Jackson, C.L., Gawthorpe, R.L., Dreyer, T. and Quinn, D., 2014. Normal fault array evolution above a reactivated rift fabric; a subsurface example from the northern Horda Platform, Norwegian North Sea. *Basin Research*, 26(4), pp.523-549.
- Wu, L., Thorsen, R., Ottesen, S., Meneguolo, R., Hartvedt, K., Ringrose, P. and Nazarian, B., 2021. Significance of fault seal in assessing CO<sub>2</sub> storage capacity and containment risks—an example from the Horda Platform, northern North Sea. *Petroleum Geoscience*.  
835
- Yielding, G., Badley, M.E. and Freeman, B., 1991. Seismic reflections from normal faults in the northern North Sea. *Geological Society, London, Special Publications*, 56(1), pp.79-89.
- Yielding, G., Freeman, B. and Needham, D.T., 1997. Quantitative fault seal prediction. *AAPG bulletin*, 81(6), pp.897-917.
- Yielding, G., 2002. Shale gouge ratio—Calibration by geohistory. In *Norwegian Petroleum Society Special Publications* (Vol. 11, pp. 1-15). Elsevier.  
840
- Yielding, G., Bretan, P. and Freeman, B., 2010. Fault seal calibration: a brief review. *Geological Society, London, Special Publications*, 347(1), pp.243-255.
- Yielding, G. and Freeman, B., 2016. 3-D seismic-structural workflows—examples using the hat creek fault system. In: B. Krantz, C. Ormand, & B. Freeman, eds, 3-D structural interpretation: Earth, mind, and machine: AAPG Memoir 111, p. 155-171.  
845

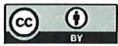

Tao, Z. and Alves, T.M., 2019. Impacts of data sampling on the interpretation of normal fault propagation and segment linkage. *Tectonophysics*, 762, pp.79-96.

## Figures

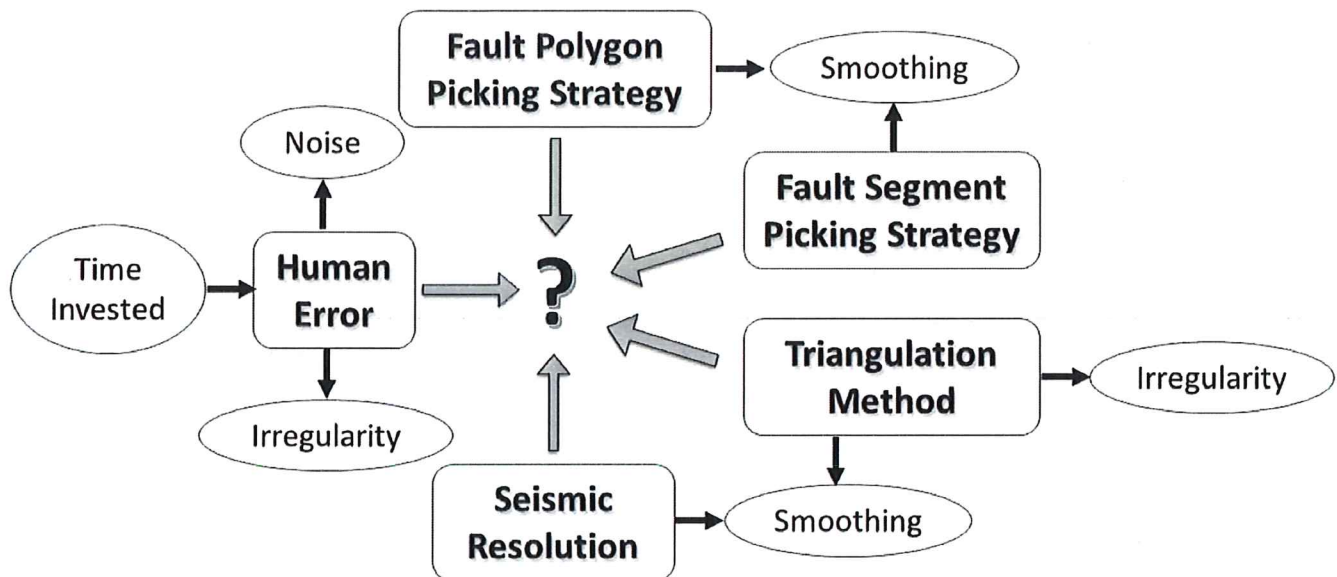

850

Figure 1. Schematic workflow of factors that contribute to documenting the optimum picking strategy that provides the most geologically reasonable result within the shortest timeframe. Several contributing factors add noise and irregularity to fault surfaces (such as human error and triangulation method), while others act to smooth the data (such as seismic resolution, fault polygon and segment picking strategy, and triangulation method). It is finding the balance between those factors that add irregularity and those that act to smooth data that is crucial.

855

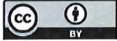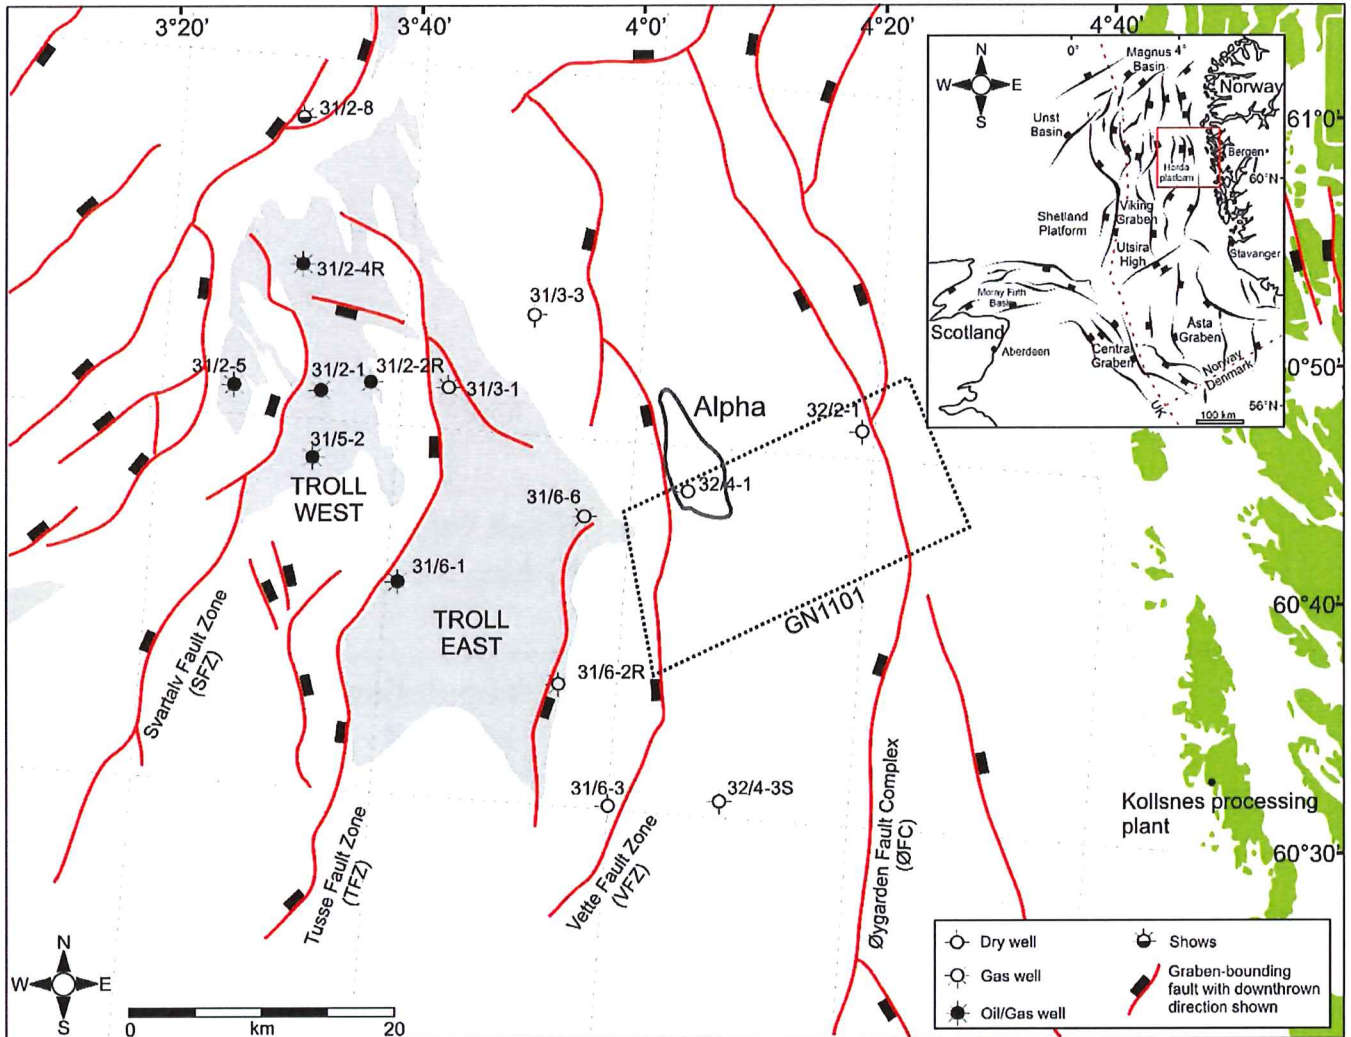

860 **Figure 2.** Location of the Smeaheia site within the Horda platform, indicated by the Alpha prospect, partially covering the GN1101  
 survey. Graben-bounding faulting shown, along with the OWC of the Troll field. 3D survey used in the analysis is outlined by a  
 865 black dashed line: GN1101. Wells used in the analysis shown. Norwegian license blocks shown. Norwegian coastline outlined in  
 green with the Kollsnes processing plant highlighted for reference. From Norwegian Petroleum Directorate Fact Maps  
 ([http://factmaps.npd.no/factmaps/3\\_0/](http://factmaps.npd.no/factmaps/3_0/)). Inset: Location of the Horda platform in relation to the North Sea, Norwegian and Scottish  
 coastline. Main structural elements shown, such as basin-bounding faults, main basins and structural highs. After Mulrooney et  
 al., 2020.

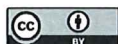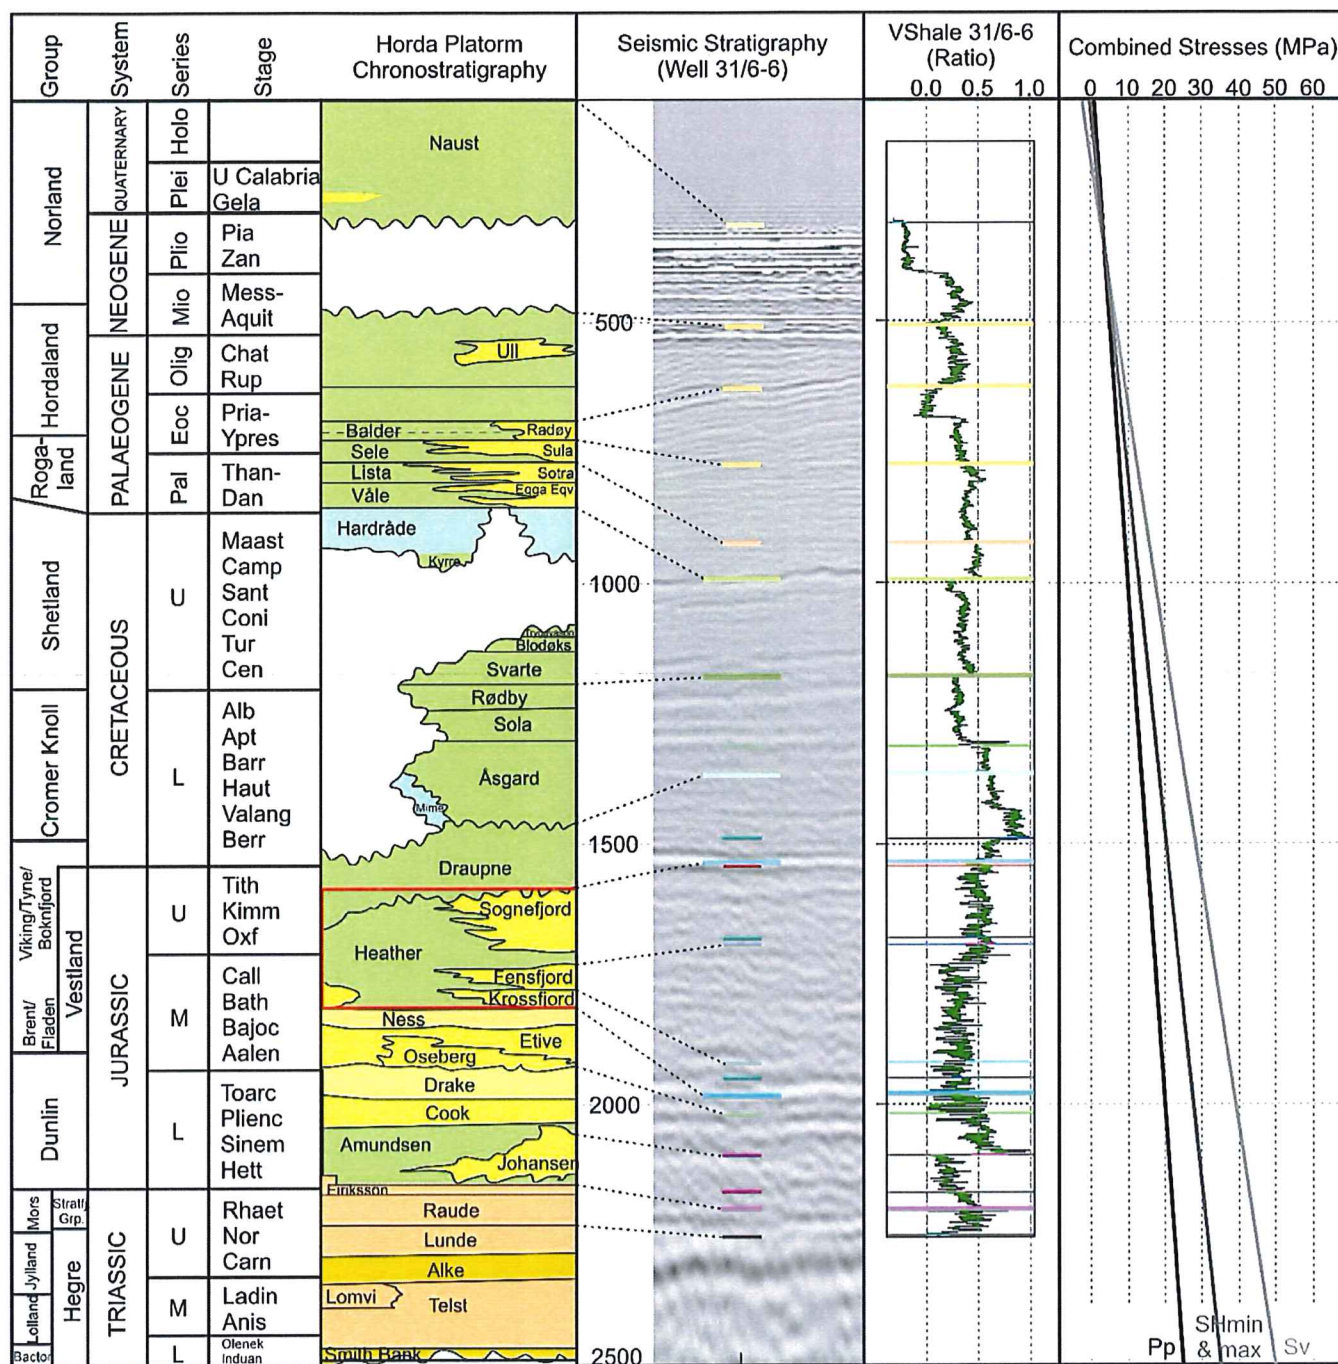

Figure 3. Lithostratigraphic chart of the Horda Platform from Halland et al. (2011), with the area of interest highlighted in the red box: the Sognefjord, Fensfjord and Krossfjord formations. A seismic section is shown intersecting well 31/6-6 within the survey SG9202. Marker horizons shown, corresponding to the lithostratigraphic column. VShale curve from well 31/6-6 shown, with marker horizons for reference. In situ stress field shown using the combined stresses (in MPa). Pp: pore pressure. SHmin: Minimum horizontal stress. SHmax: Maximum horizontal stress. Sv: Vertical stress. Seismic stratigraphic column, VShale and combined stress field all have the same depth range.

870

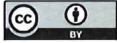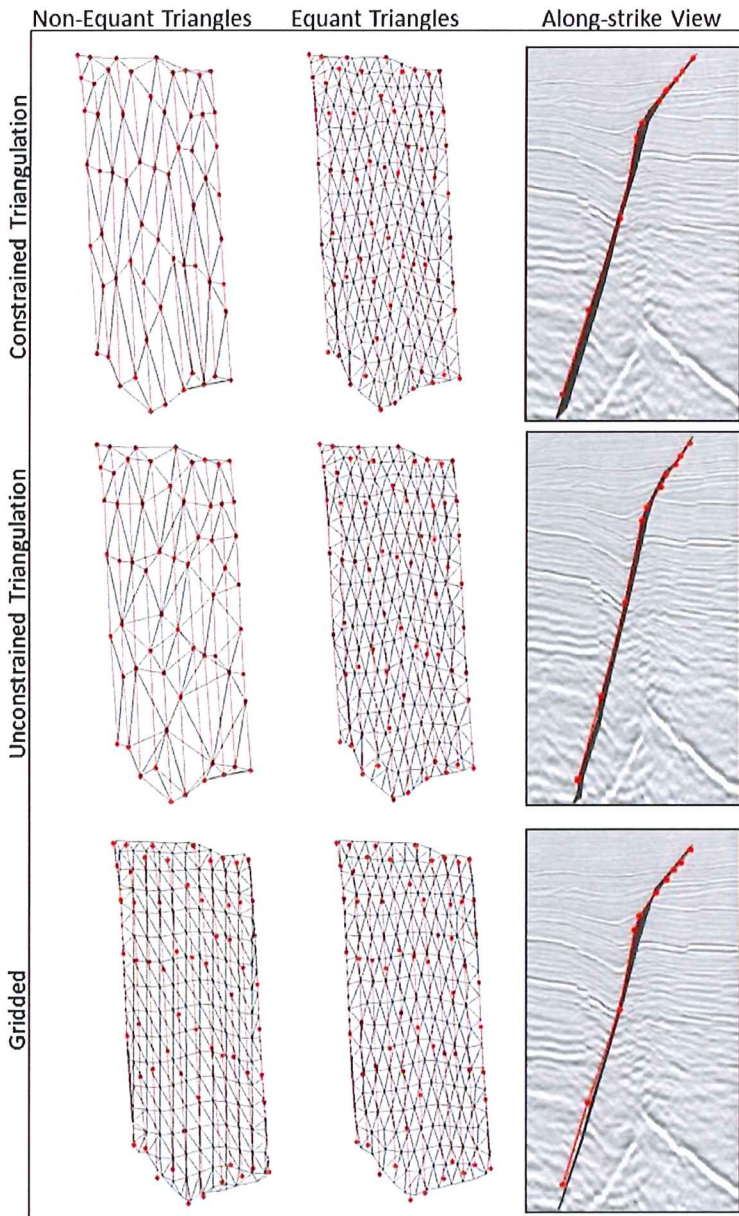

875

880

**Figure 4.** An example of arbitrary fault segments picked on every 10<sup>th</sup> line (250 m line spacing), showing how different triangulation methods produce differing fault surfaces. This has been done for non-equant and equant triangles (at a size of 250 m) for constrained and unconstrained triangulation, as well as gridded methods. Fault segments are shown in red while the triangulated surfaces are shown by black lines. How these triangulation methods along-fault strike is shown (non-equant triangles), next to the picked fault segments, indicating how much smoothing is added. Constrained triangulation honours all nodes and adjacent segments, adding more irregularity to the fault surface. Gridded creates a surface that is the best fit, smoothing the surface. Note that in this example, the smoothing and irregularity of the fault surface is subtle due to the wide spacing of the fault segments; narrower spacing leads to increased irregularity.

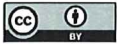

885

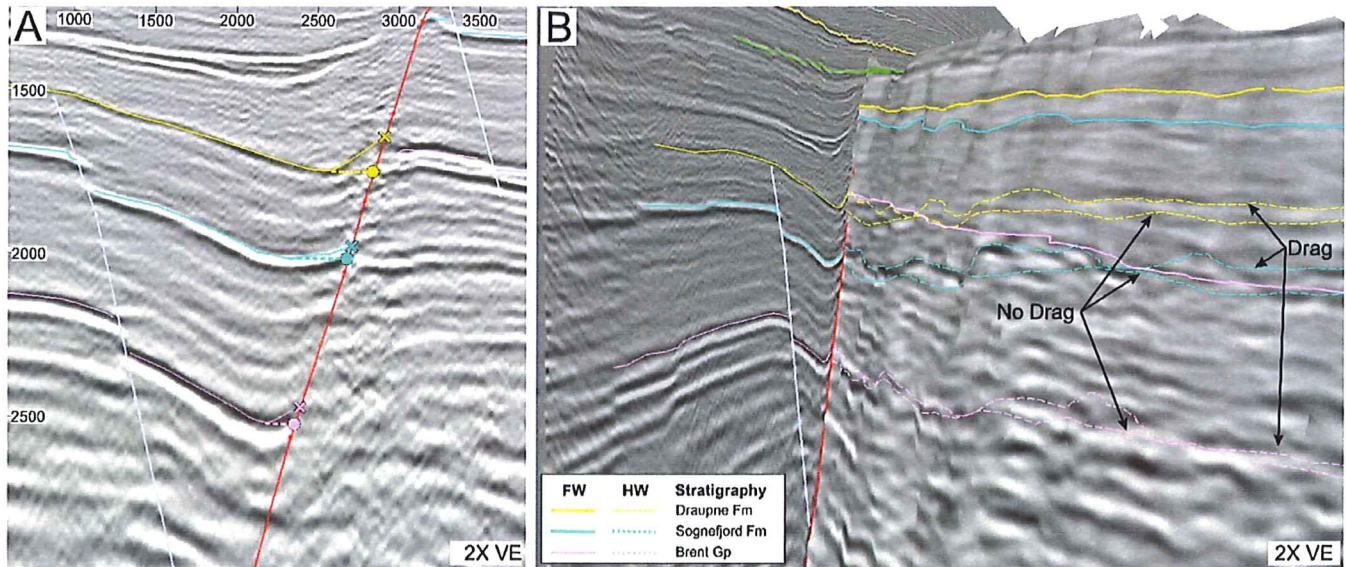

890

Figure 5. A: Inline 1224 from the GN1101 survey showing how two different polygons are created: with and without incorporating drag. Polygons including drag simply model where the drag intersects the faults, as shown by the X on the faults for the Draupne Fm (yellow), Sognefjord Fm (blue) and Brent Gp (pink) horizons. Polygons are modelled with no drag by observing the lowest point in the hanging wall syncline, and extrapolating this point perpendicularly to the fault plane, as indicated by the dashed horizontal lines and the circles at the intersections. B: Oblique view of inline 1224 and the fault surface showing the FW (solid line) and HW cutoffs (dashed lines). The two iterations of the HW cutoffs show the difference between incorporating drag and modelling the polygons with no drag. The fault surface shows the seismic slice from 10 m into the hanging wall.

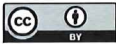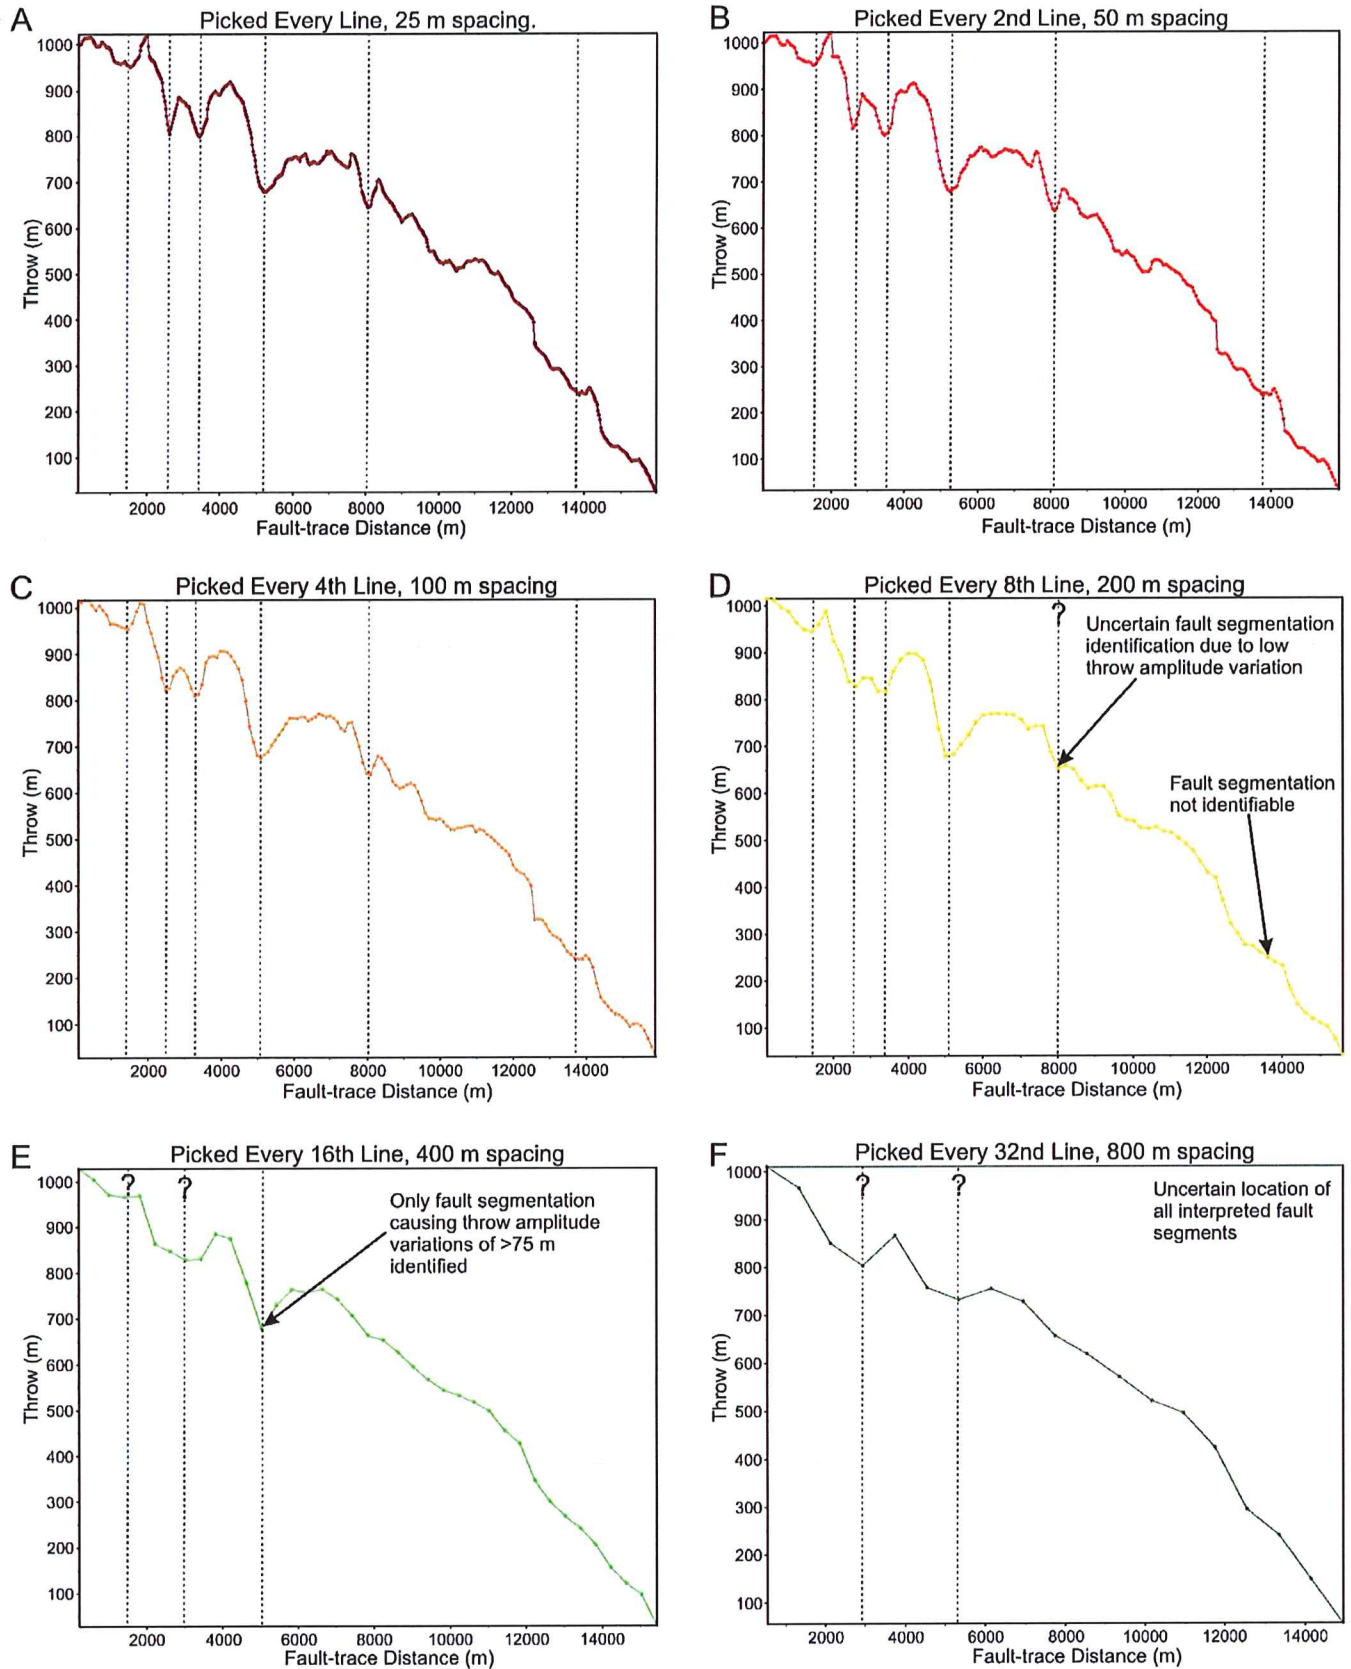



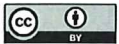

895

**Figure 6. Fault Throw-Distance plots for each picking strategy: 1, 2, 4, 8, 16 and 32. Location of fault segmentation identified by changes in throw along strike is highlighted using dashed vertical lines. Those that are uncertain are indicated using a question mark. Picking using every line generates an accurate throw profile, indicating seven fault segments have generated the current Vette fault observed within the GN1101 survey. This is also shown using every 2<sup>nd</sup> and 4<sup>th</sup> line. Location and number of fault segments become increasingly uncertain when the spacing increases beyond every 4<sup>th</sup> line.**

900

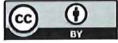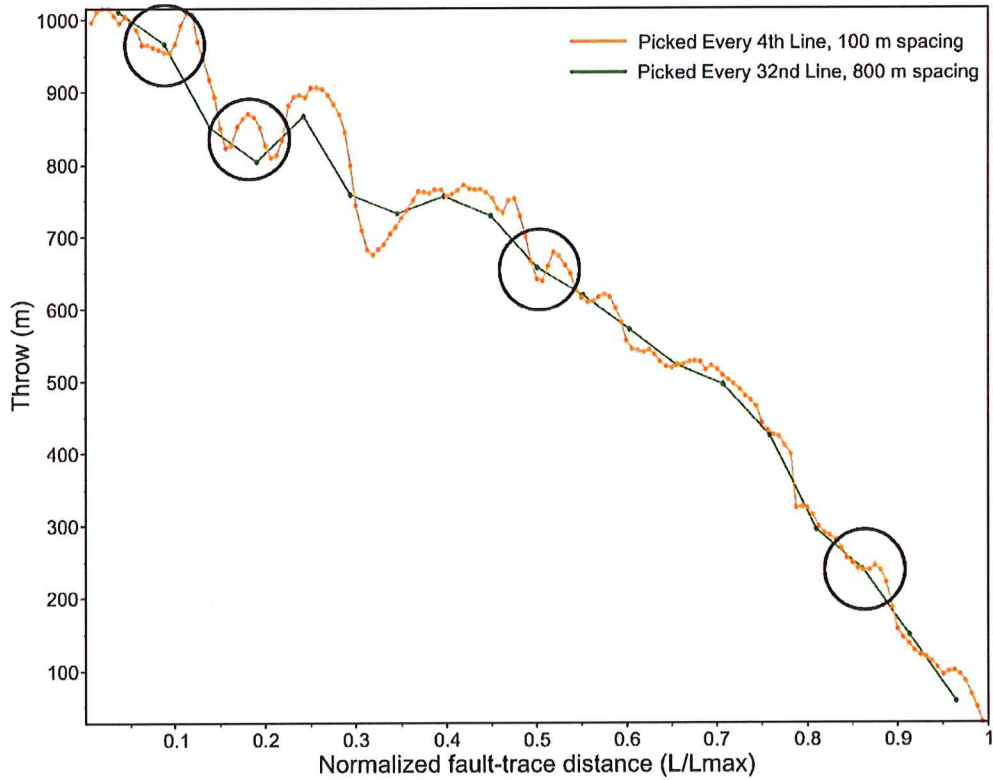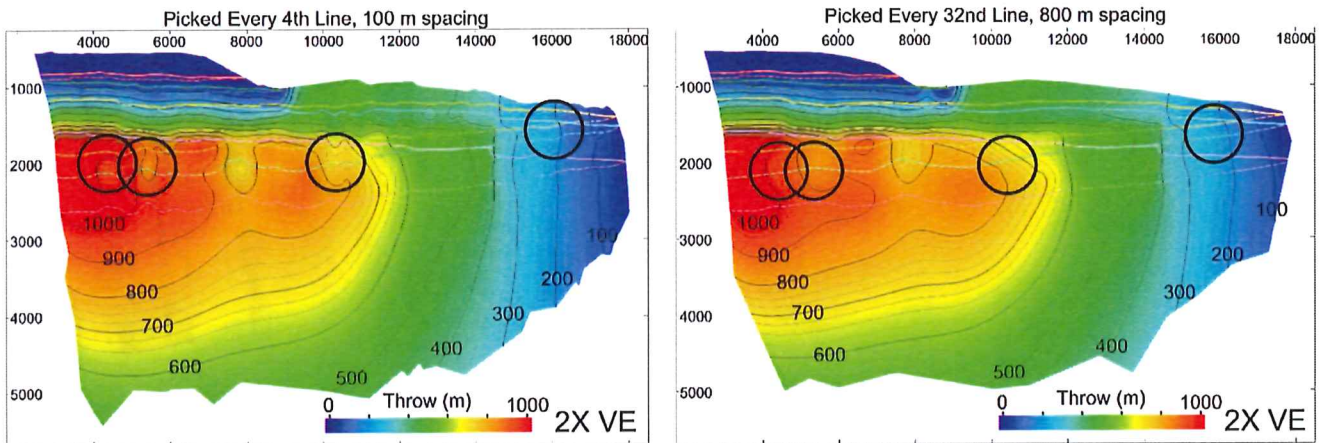

905 **Figure 7. Top: Fault throw-distance profile for the Vette fault picked on every 4<sup>th</sup> and 32<sup>nd</sup> line. The x-axis has been normalized for**  
**distance along fault-trace (Length/Length max), in order to directly compare the two scenarios. Bottom: Contoured fault throw**  
**plots displaced on a fault surface picked on every 4<sup>th</sup> line (left) and 32<sup>nd</sup> line (right). Circles highlighted in the throw-distance graph**  
**correspond to the same circles highlighted on the fault throw plots. We can observe the four fault segments that are not recorded**  
**when a picking strategy of 32<sup>nd</sup> line spacing is used. These fault segments are recorded in the throw profile when a narrower spacing**  
910 **strategy is used, but are smoothed out and lost when a wider spacing strategy is used. Note that unconstrained triangulation is used**  
**for fault surface generation.**

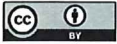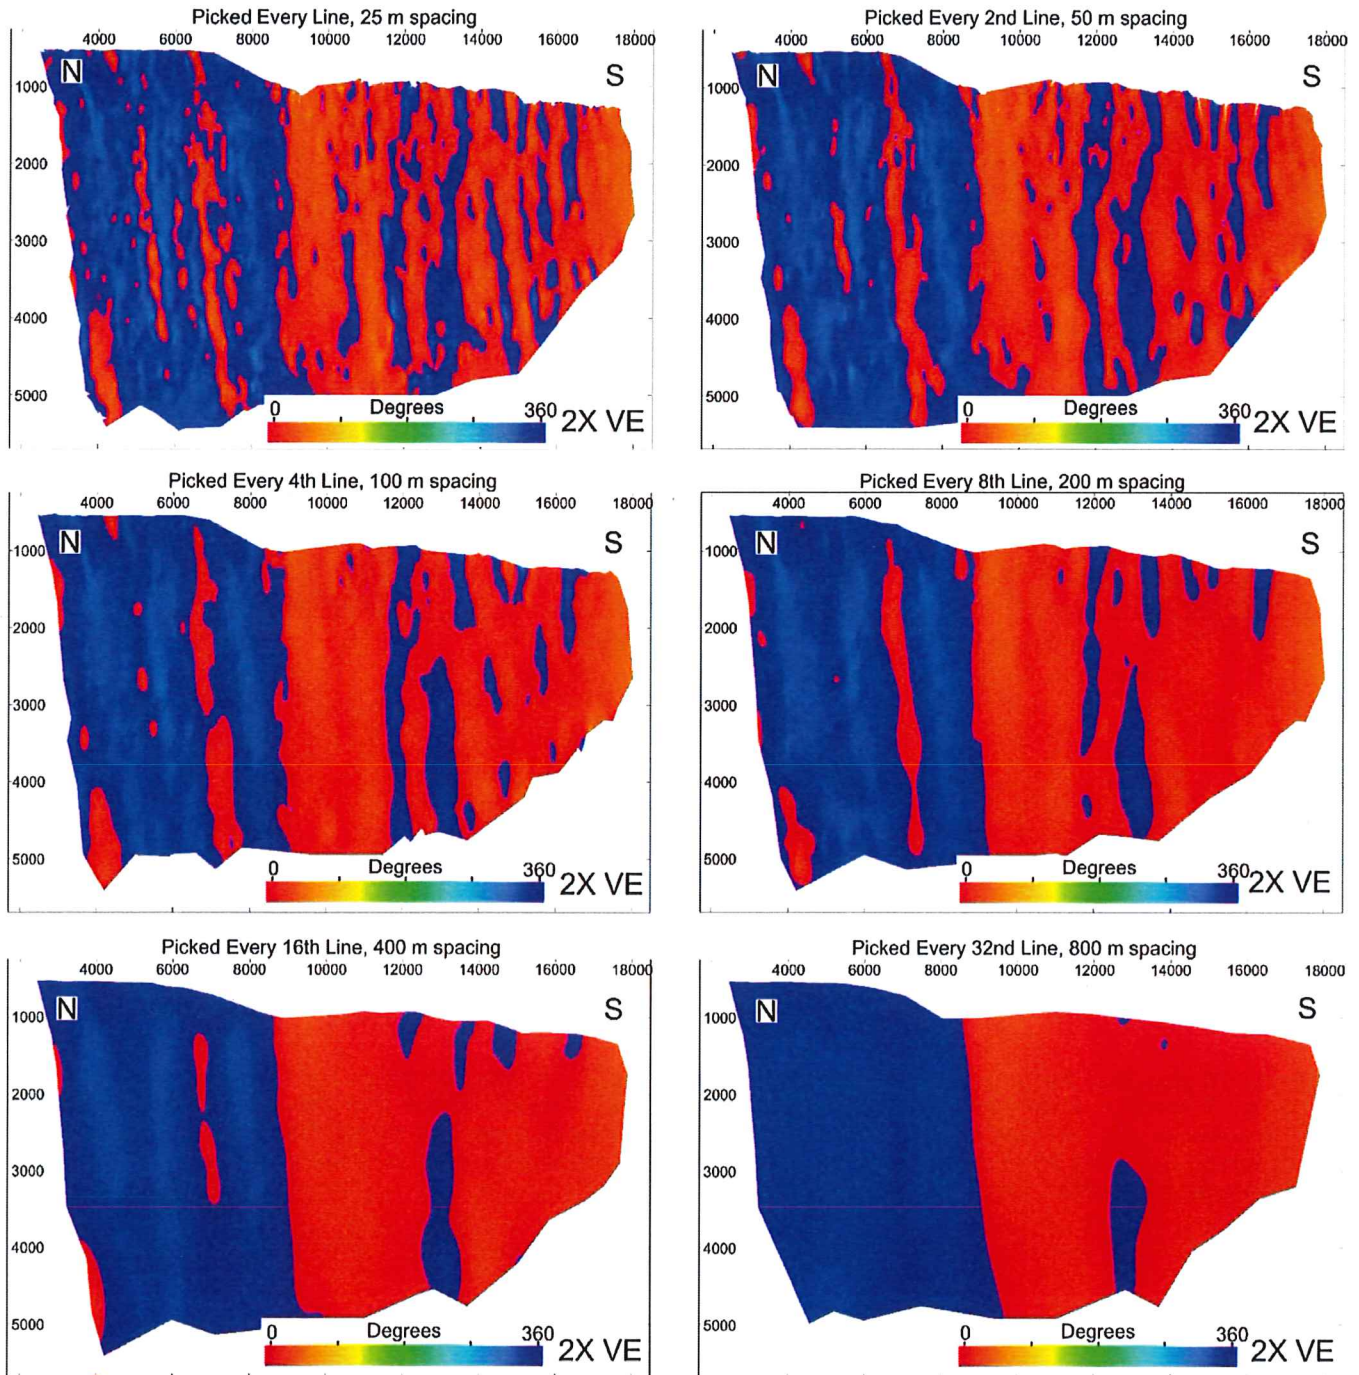

915 **Figure 8.** Fault plane diagrams showing fault strike attribute displayed on the fault surfaces for each picking strategy: 1, 2, 4, 8, 16 and 32 lines. Fault strike is observed to vary with line spacing used for fault picking. A highly irregular fault surface is observed when every line is used for picking, when compared to the overly smooth surface when every 32<sup>nd</sup> line is used for picking. Note that unconstrained triangulation is used for fault surface generation.

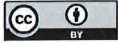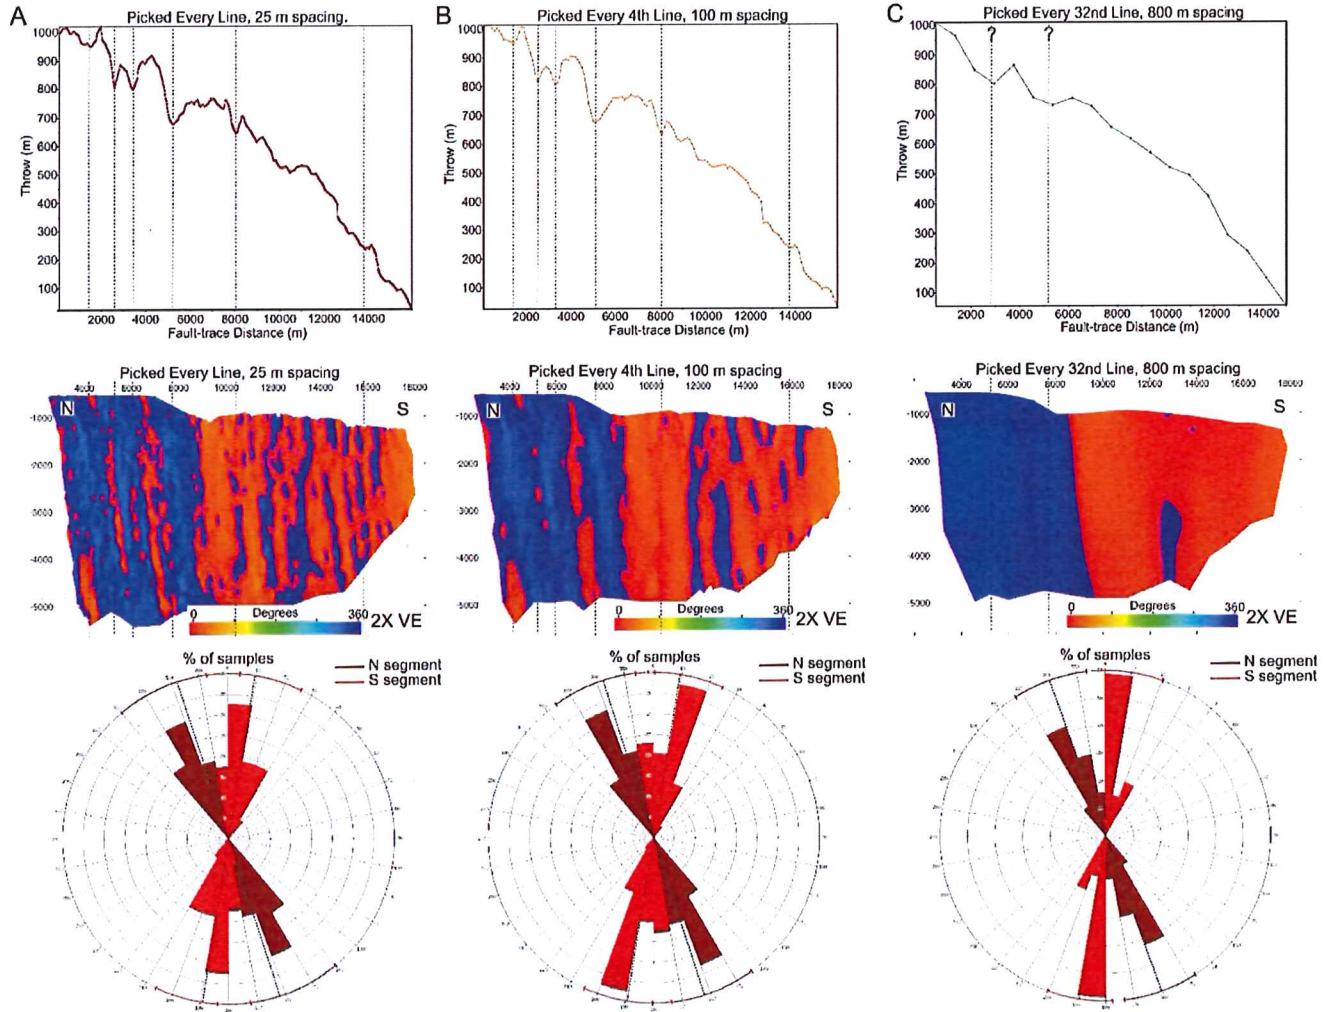

920 **Figure 9.** TD plots, fault plane diagrams showing strike, and rose diagrams for scenarios picked every line (A), every 4<sup>th</sup> lines (B) and every 32<sup>nd</sup> line (C). Areas where fault segmentation has been picked using the TD plots have been extrapolated onto the fault plane diagrams in order to assess whether areas of strike irregularities are fault corrugations highlighting areas of segmentation. Rose diagrams illustrating the orientation and range of orientation for each scenario. Note that unconstrained triangulation is used for fault surface generation.

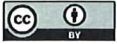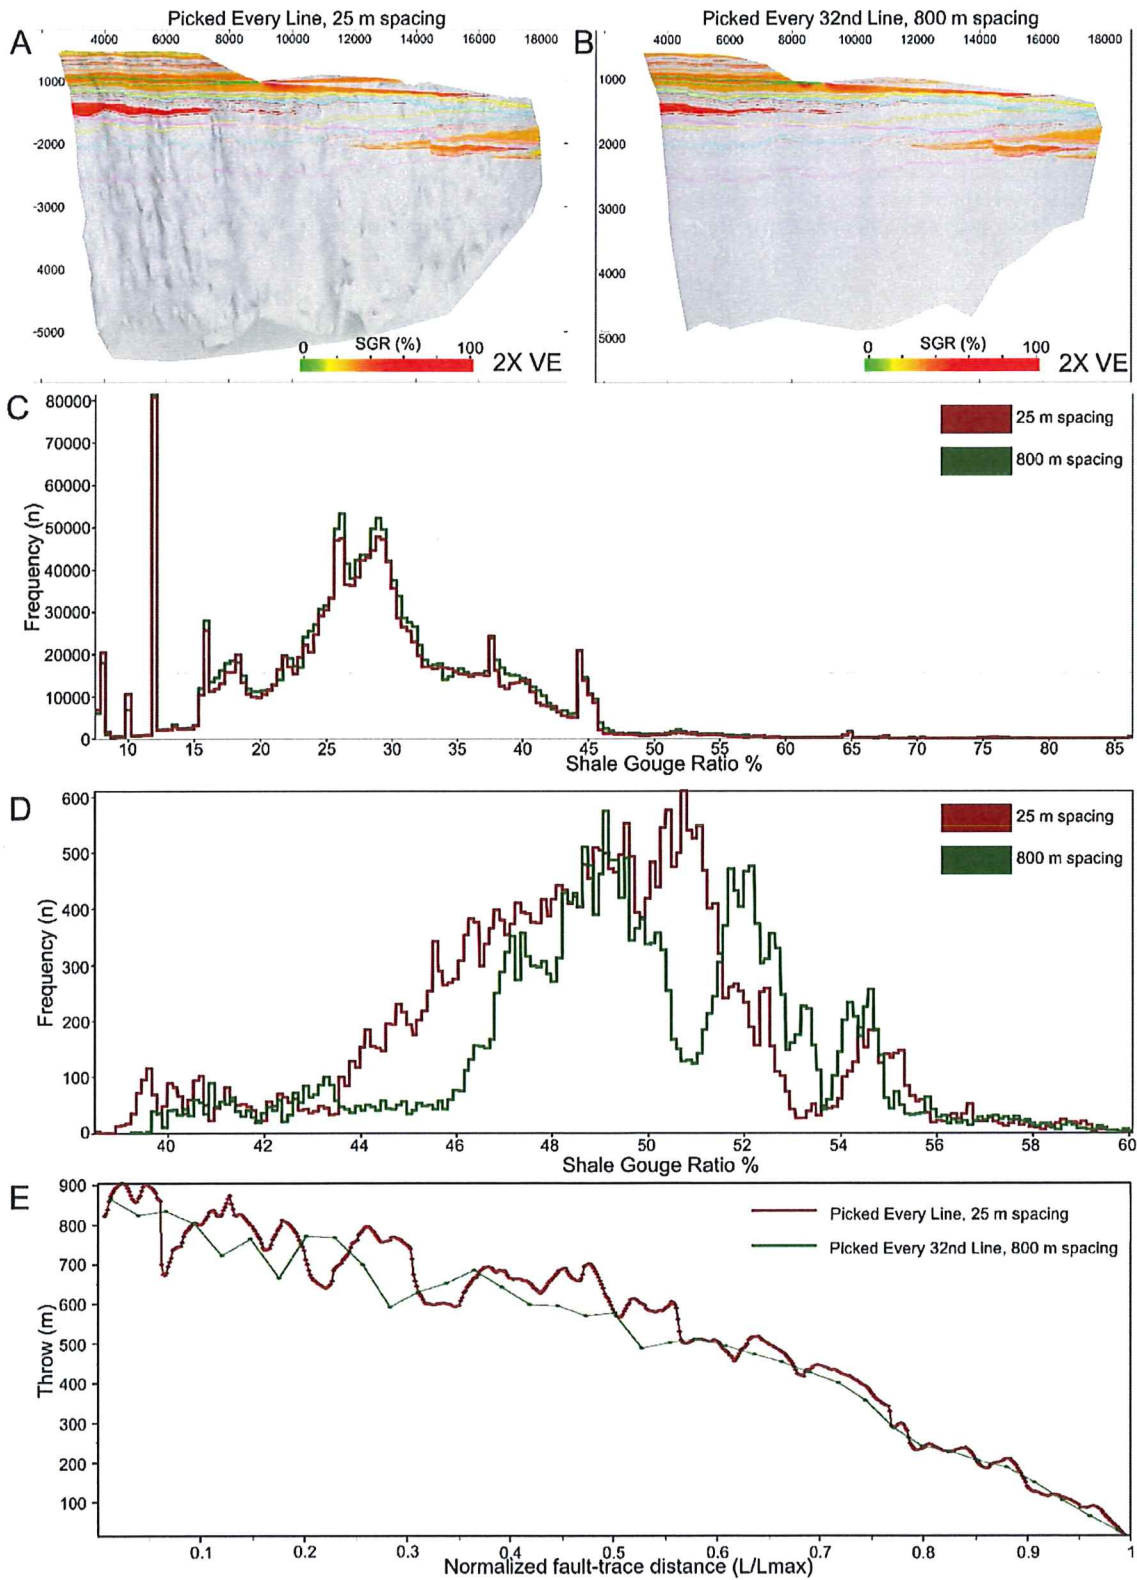

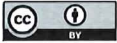

930 **Figure 10. Influence of picking strategy on the predicted shale gouge ratio (SGR). A and B: Fault plane diagrams showing the predicted SGR at low VShale ( $<0.4$ ) overlaps (sand-sand juxtapositions) along the fault, when a 25 m picking spacing is used (A) and when an 800 m picking spacing is used (B). C and D: Histograms showing the frequency of SGR for different picking strategies, dark red: 25 m spacing, green: 800 m spacing. C: Histogram for predicted SGR along the entire fault surface. D: Histogram for predicted SGR at low VShale overlaps within the juxtaposed Sognejord Formation in the footwall. E: Throw-Distance plot for fault polygons picked every 25 m (dark red) and 800 m (green). Note, the distance has been normalized.**

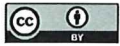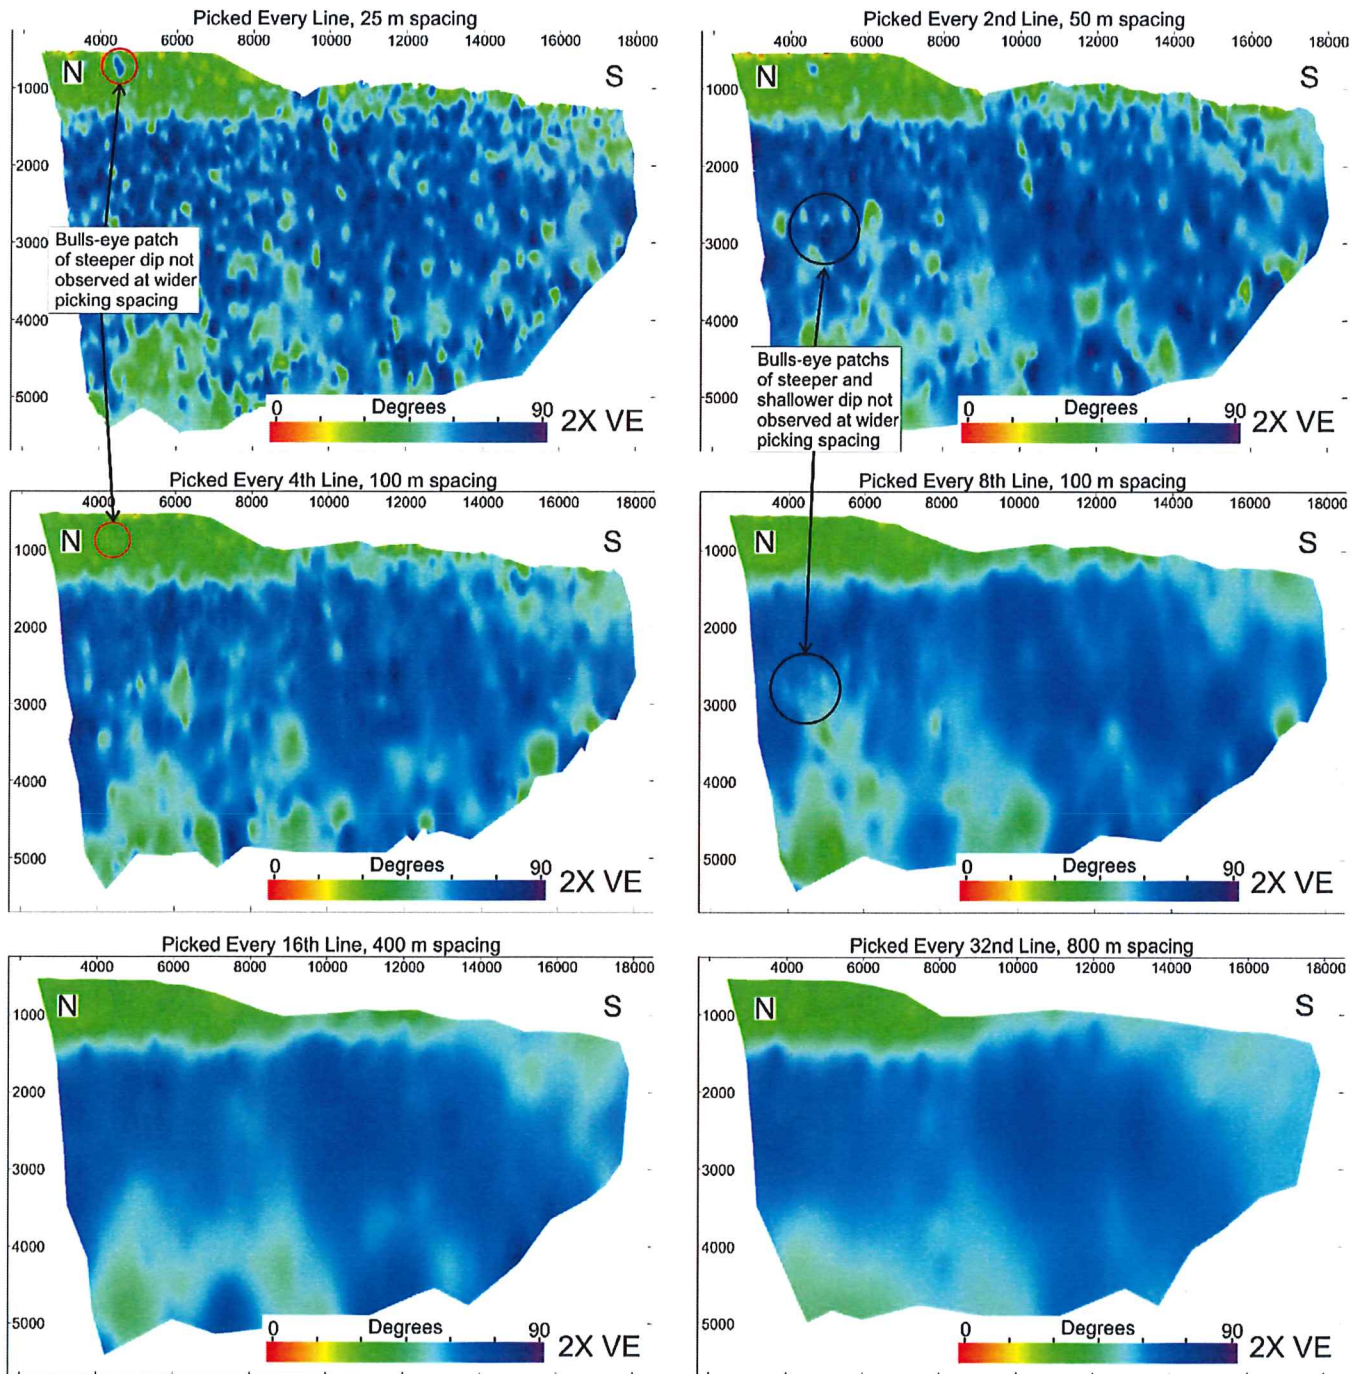

935

**Figure 11. Fault plane diagrams showing fault dip attribute displayed on the fault surfaces for each picking strategy: 1, 2, 4, 8, 16 and 32 lines. Fault dip is observed to vary with line spacing used for fault picking. A highly irregular fault surface is observed when every line is used for picking, when compared to the overly smooth surface when every 32<sup>nd</sup> line is used for picking. Note that unconstrained triangulation is used for fault surface generation.**

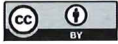

940

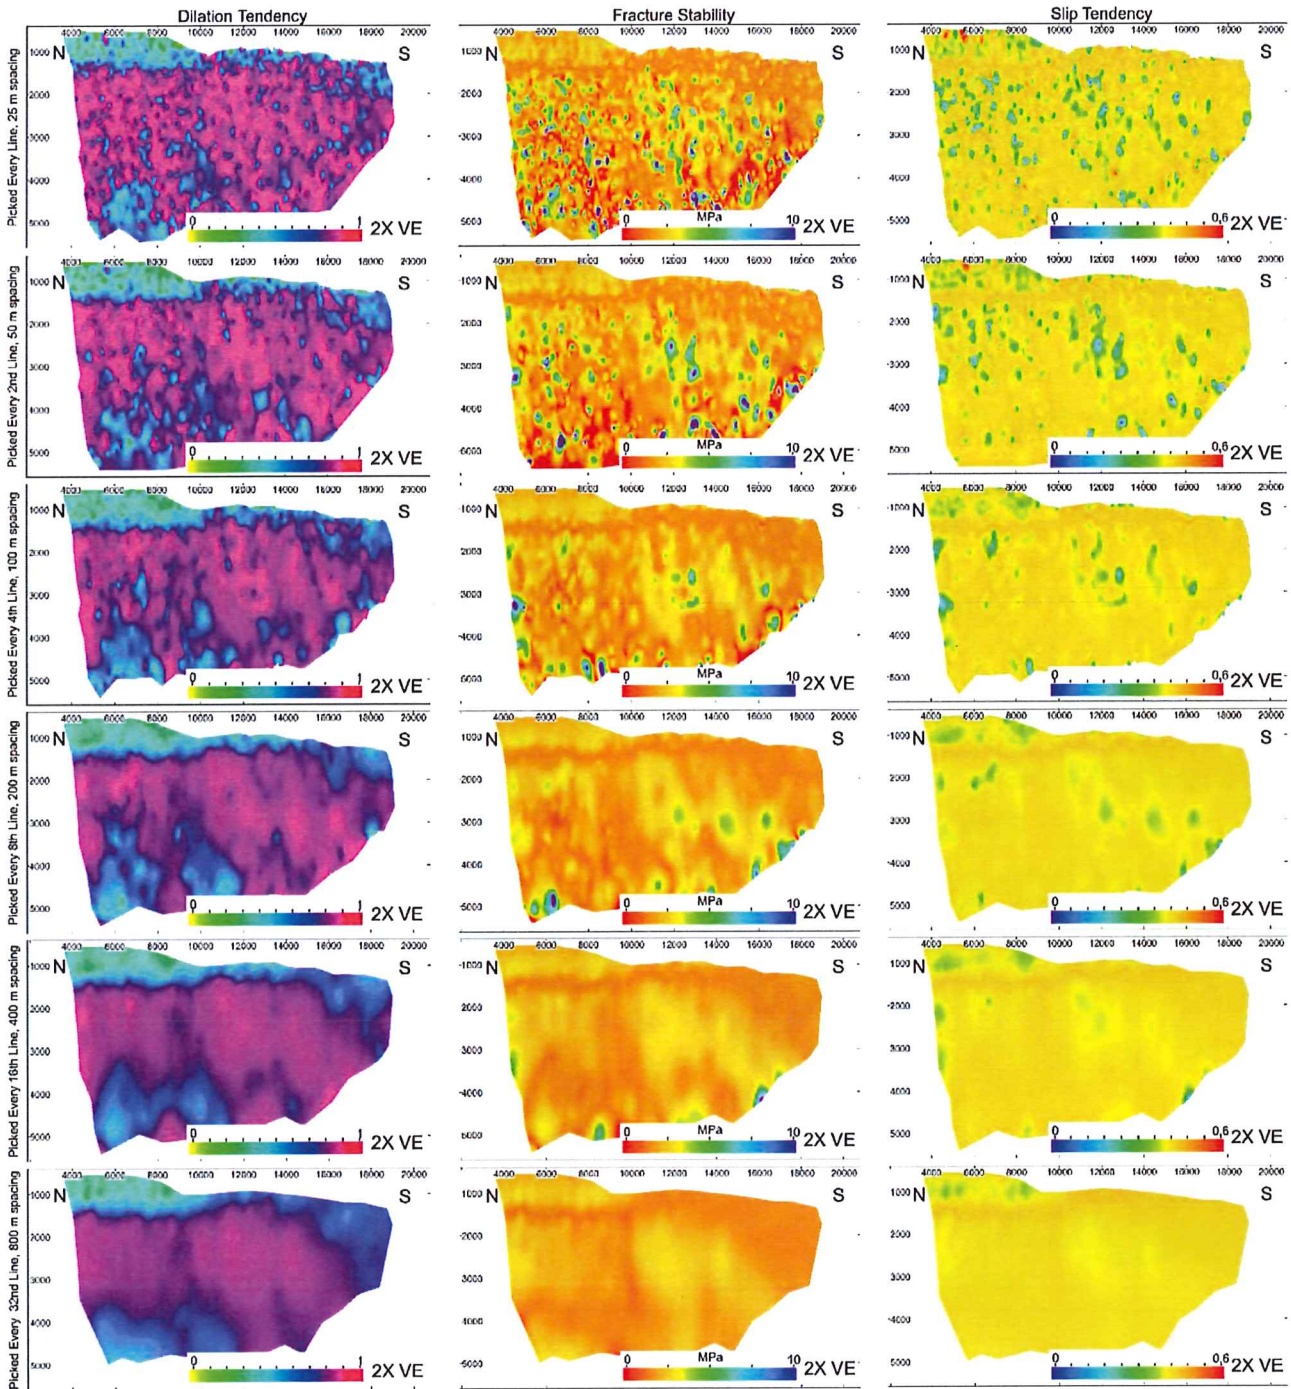

**Figure 12.** Fault plane diagrams showing the fault reactivation potential, specifically dilation tendency, fracture stability and slip tendency, for each picking strategy: 1, 2, 4, 8, 16 and 32. Different conclusions regarding fault stability occurs due to differing picking strategies. When using narrow spaced lines for fault picking, the fault shows a lesser likelihood of failing by either tensile



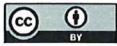

945 or shear failure. Conversely, when wider line spacing is used, the fault becomes less stable, showing an increased likelihood for both tensile and shear failure. However, these patterns depend on the location along and up the fault. Note that unconstrained triangulation is used for fault surface generation.

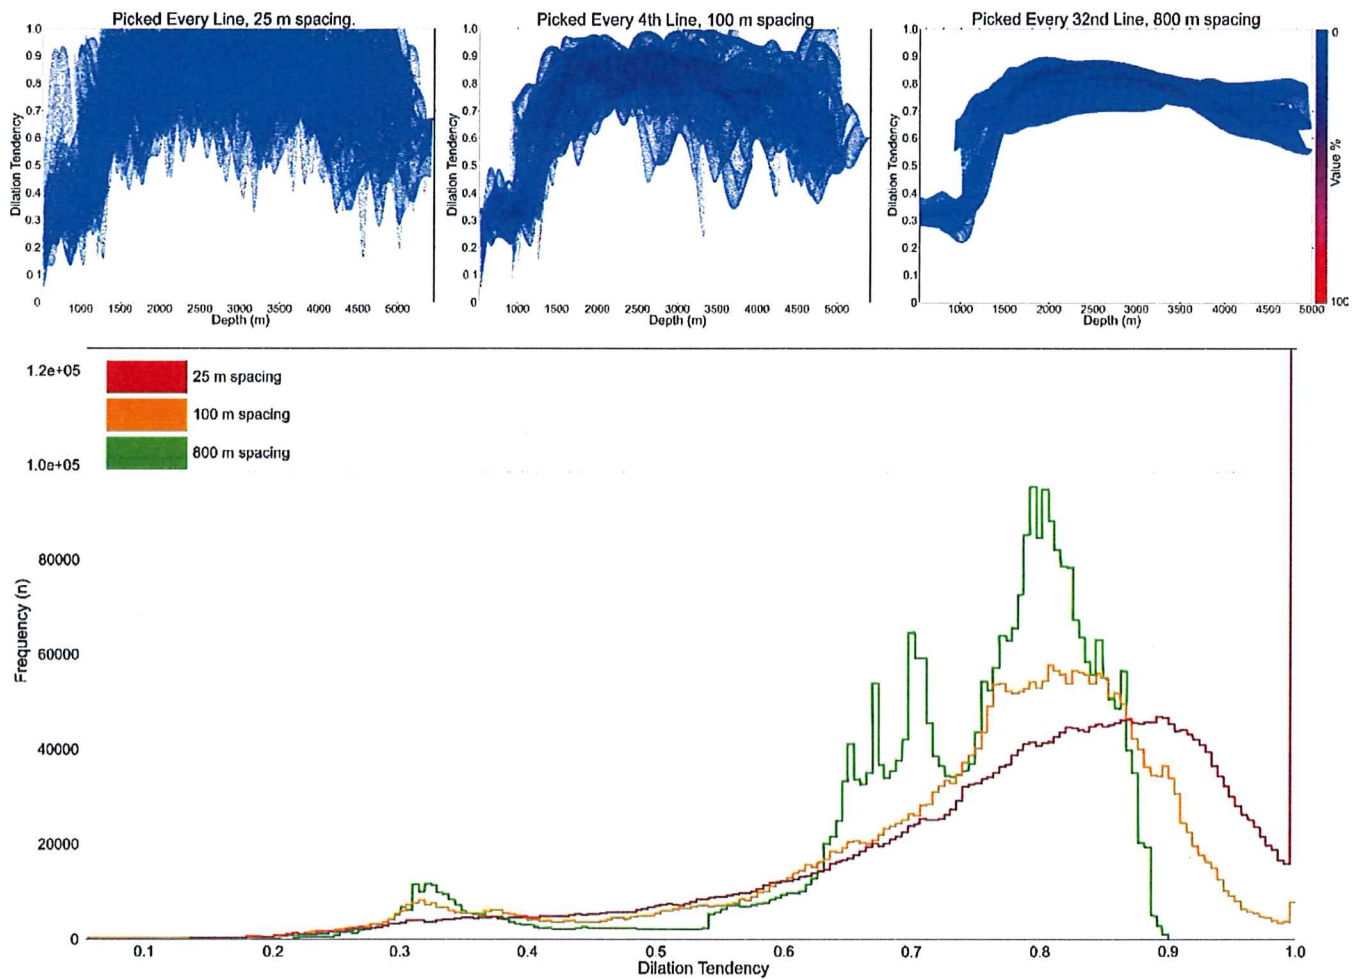

950

955 **Figure 13.** A-C: plots showing dilation tendency with depth, for scenarios picked on every line (A), every 4<sup>th</sup> line (B) and every 32<sup>nd</sup> line (C). Colour intensity reflects the frequency of those values, where blue is 1% and red is 100% frequency. D: Histogram showing frequency of dilation tendency for scenarios picked on every line (red), every 4<sup>th</sup> lines (orange) and every 32<sup>nd</sup> line (green). Note that when every line is picked, a large portion of the values are above 1 (i.e. in failure). This decreases as the spacing decreases.

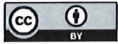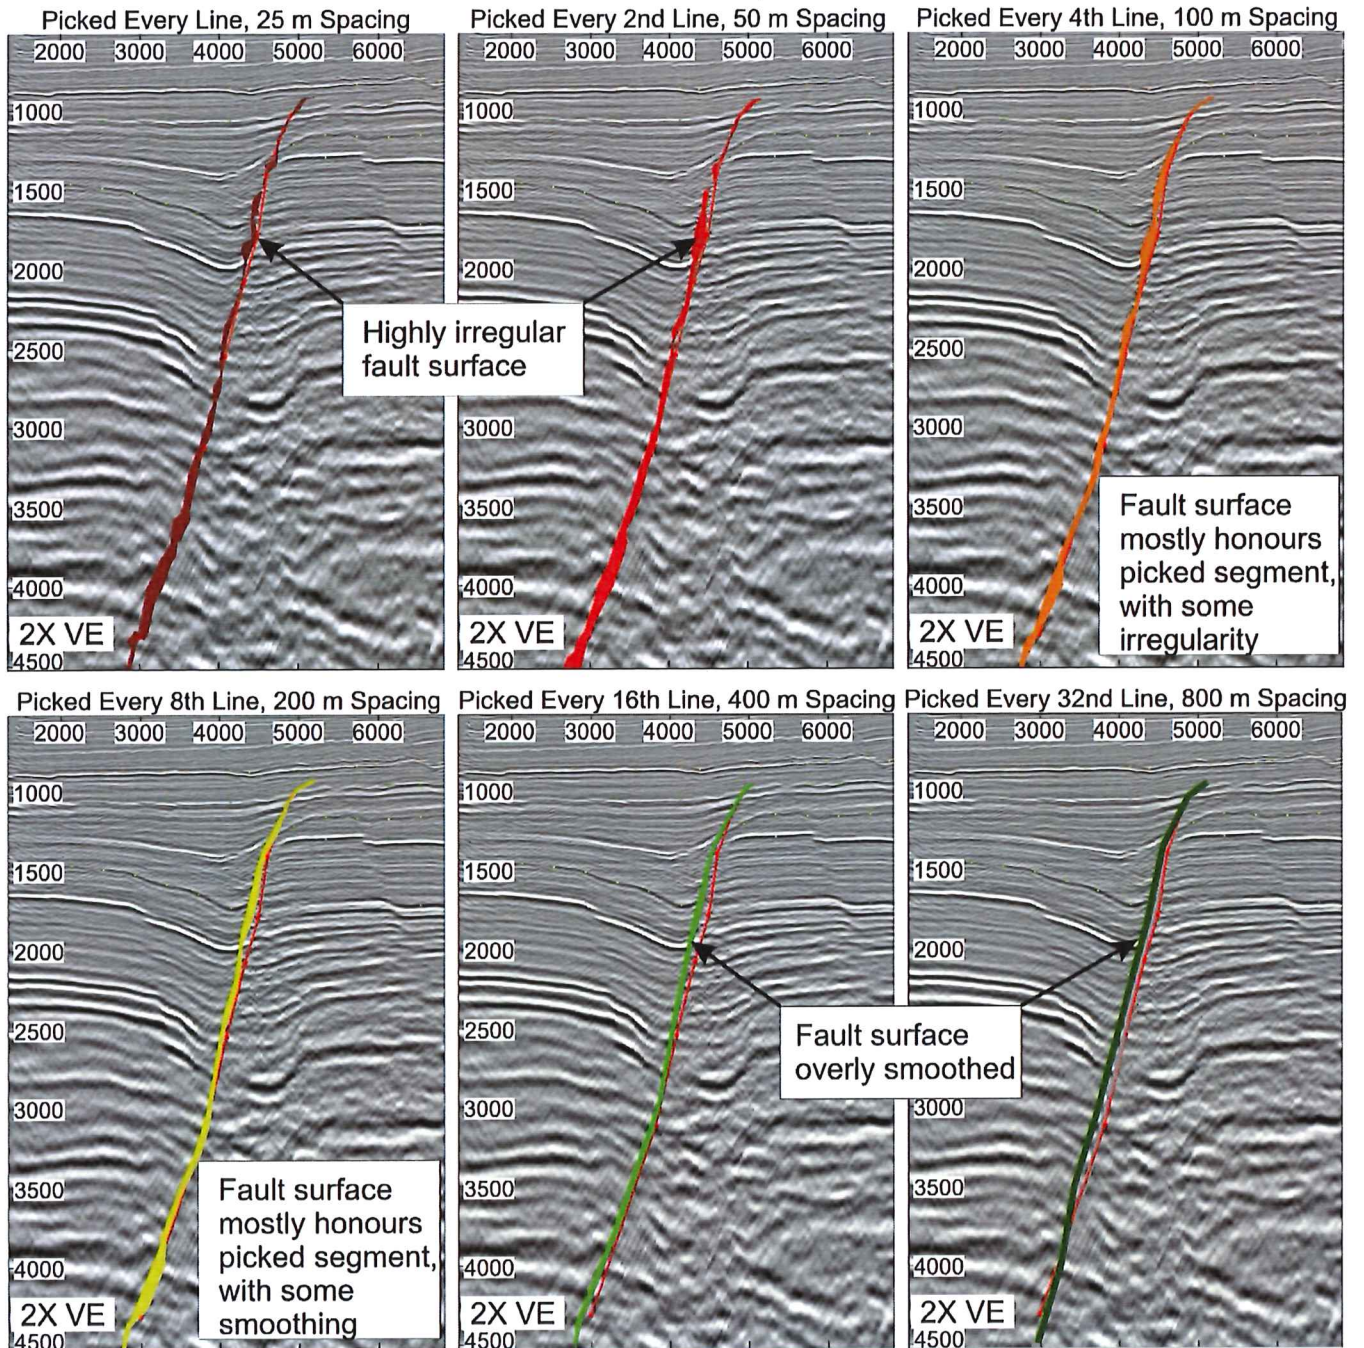

960 **Figure 14. Differences in fault surface generation depending on picking strategy: 25 m, 50 m, 100 m, 200 m, 400 m or 800 m line spacing. Picked fault segment shown as red line. Note the smoothing that occurs at greater line spacing, and the irregularity at narrower line spacing.**

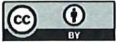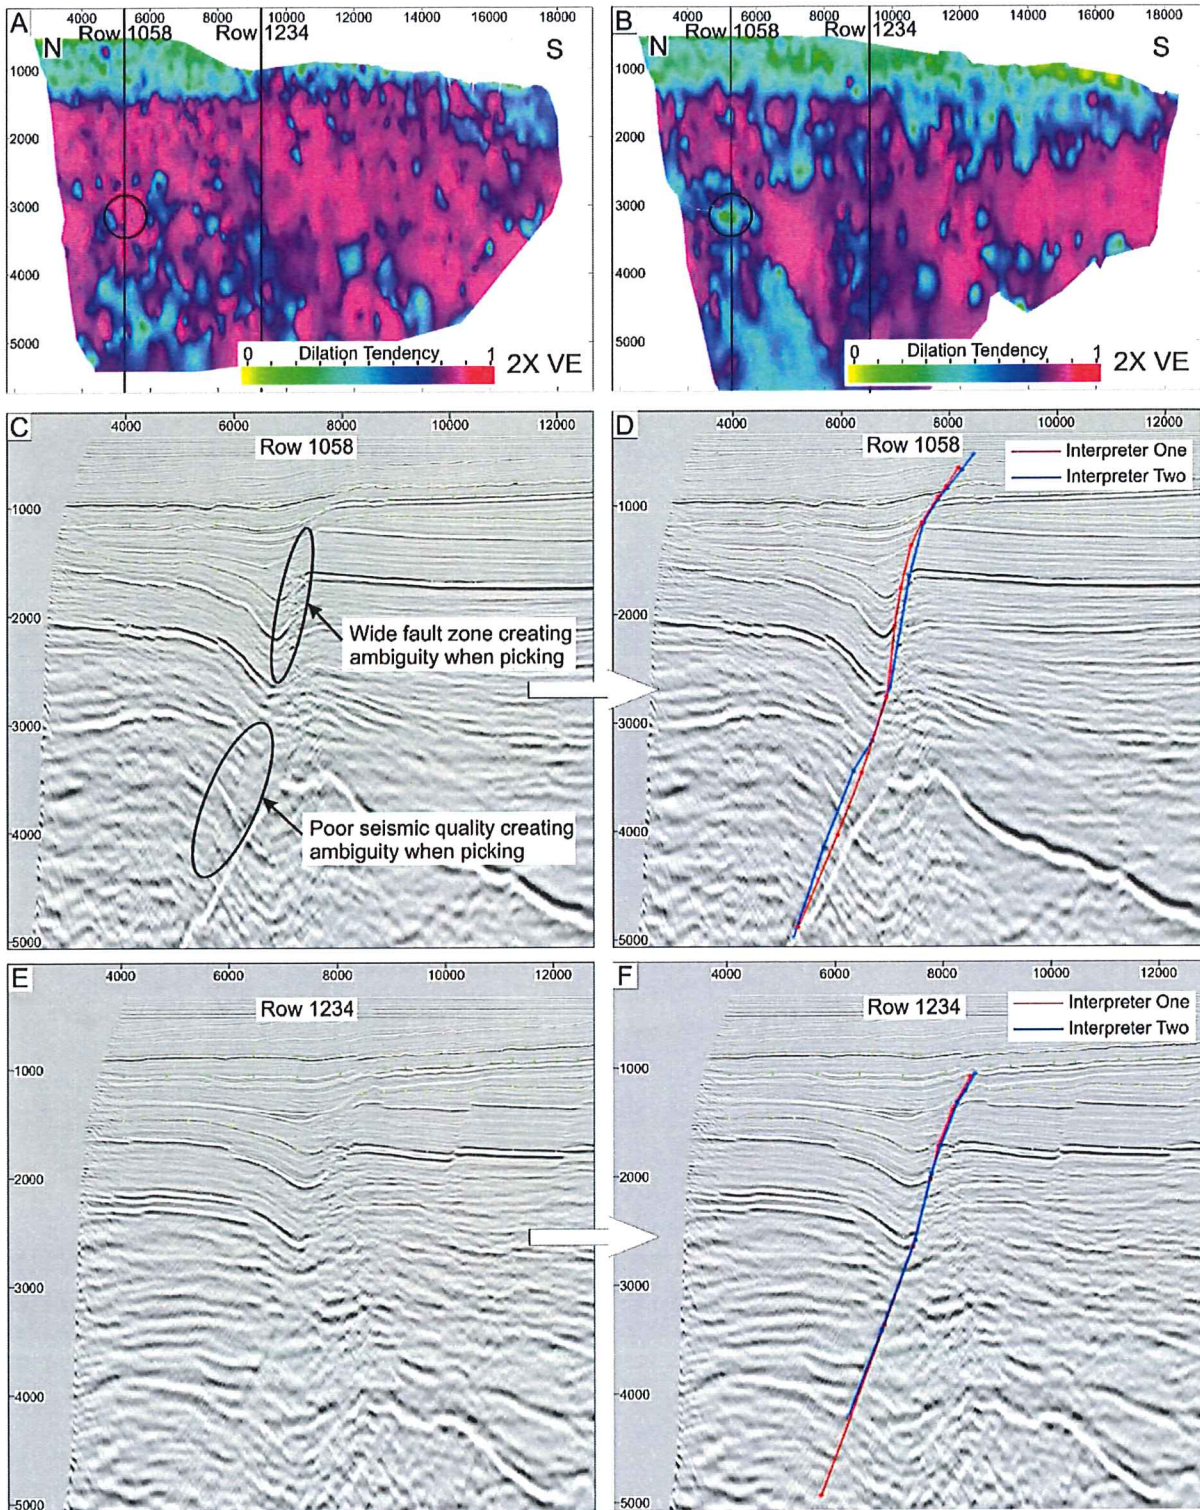

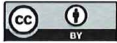

965 **Figure 15. Differences in fault picking caused by human error. Two different interpreters have picked the same fault using every**  
**2<sup>nd</sup> line (50 m spacing). A and B: Fault plane diagrams show dilation tendency to compare the differences in the fault surface. Note**  
**that unconstrained triangulation is used for fault surface generation. One area of significant difference is highlighted in the black circle.**  
**Vertical lines show location of intersecting rows 1058 (Figures C and D) and 1234 (Figures E and F) and A: Interpreter one.**  
**B: Interpreter two. C: Uninterpreted row 1058 showing a complex portion of the fault zone, leading to ambiguous interpreting. D:**  
**970 Interpretation of row 1058 by two different interpreters, red: interpreter one, blue: interpreter two. E: Uninterpreted row 1234**  
**showing a relatively simple portion of the fault zone, leading to similar interpretation from different interpreters. F: Interpretation**  
**of row 1234 by two different interpreters, red: interpreter one, blue: interpreter two.**

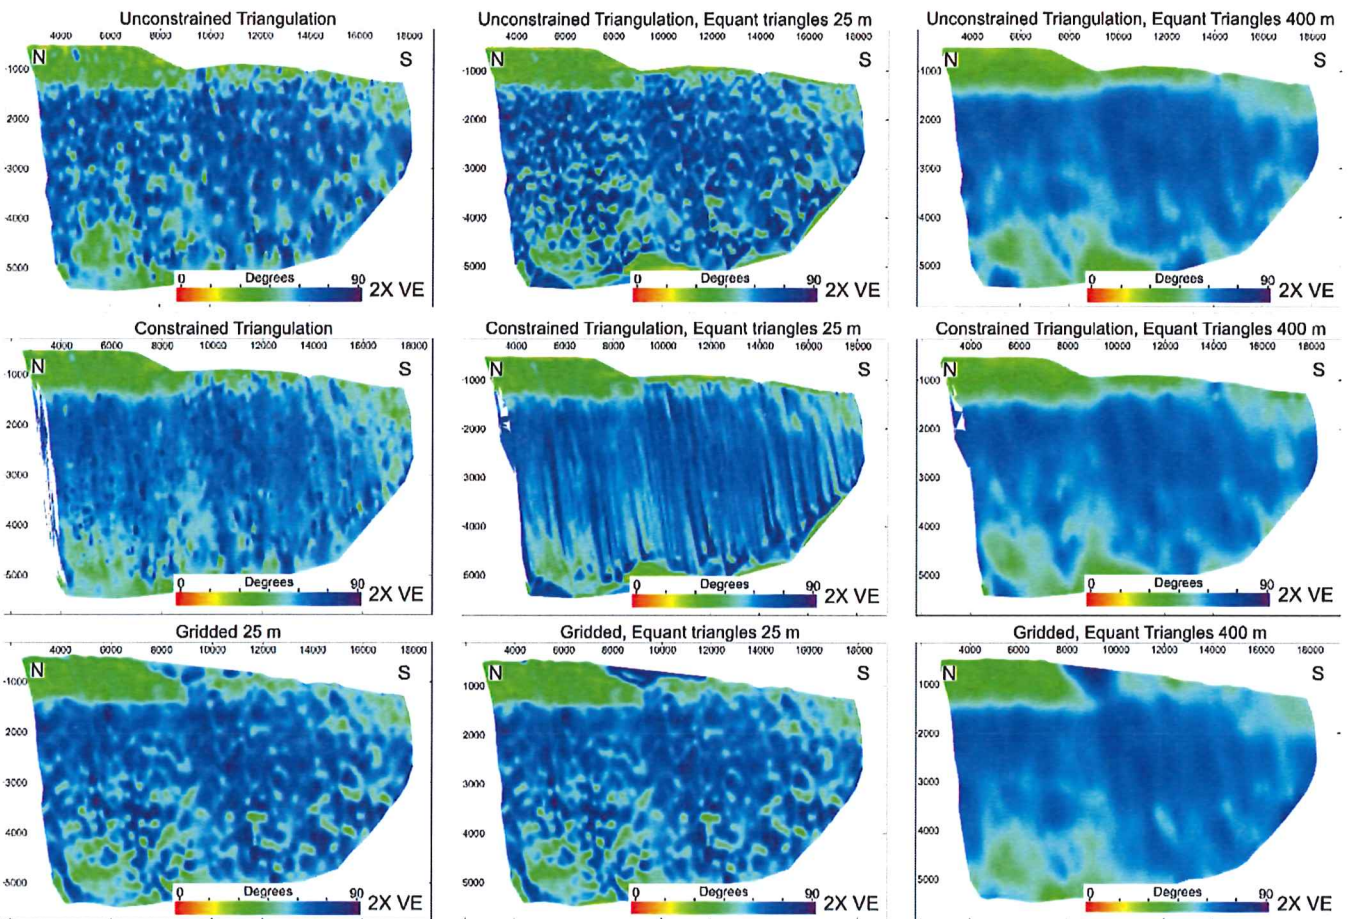

975 **Figure 16. Fault plane diagrams created using different triangulation methods for the picking strategy where every line has been**  
**interpreted, showing dip attribute. Unconstrained, constrained and gridded triangulation methods have been used, with irregular**  
**triangles and equant triangles of different sizes. We can see that vastly different surfaces are created using different techniques,**  
**leading to differences in the dip attribute.**

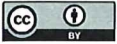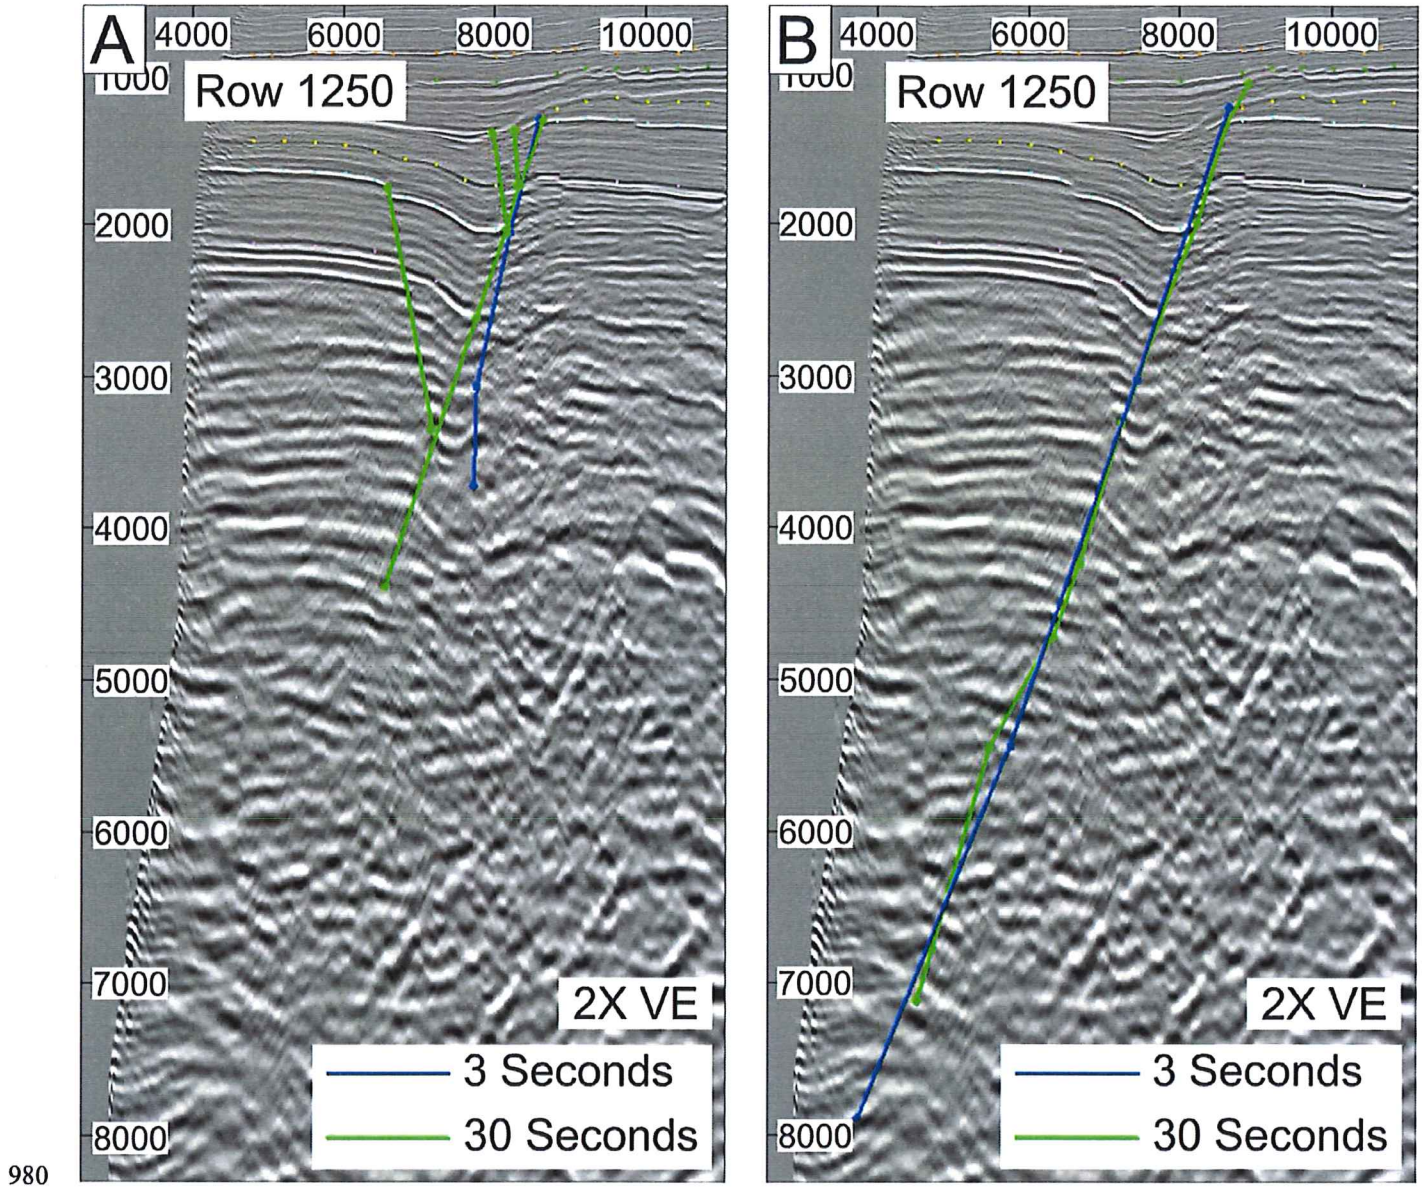

980

Figure 17. Differences in fault picking with different time constraints (3 seconds versus 30 seconds), shown by two separate interpreters (A and B), picked on the same row (row 1250).

985

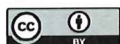

**Tables**

|       | Gradient<br>(MPa/m) | Stress<br>(MPa) | Depth<br>(m) | Direction<br>(degrees) |
|-------|---------------------|-----------------|--------------|------------------------|
| SHmin | 0.0146              | 23.07           | 1699.5       | 090                    |
| SHmax | 0.0146              | 23.07           | 1699.5       | 180                    |
| Sv    | 0.0215              | 32.37           | 1699.5       |                        |
| PP    | 0.01                | 16.94           | 1699.5       |                        |

990

**Table 1.** *In situ* stress data used for geomechanical analysis.

| Analysis      | Suggested Strategy: Segments spacing) | Picking Fault (minimum length ratio ( $\delta$ )) | Sampling Interval/Fault length ratio ( $\delta$ ) | Suggested Strategy: Polygons spacing) | Picking Fault (minimum length ratio ( $\delta$ )) | Sampling Interval/Fault length ratio ( $\delta$ ) |
|---------------|---------------------------------------|---------------------------------------------------|---------------------------------------------------|---------------------------------------|---------------------------------------------------|---------------------------------------------------|
| Fault Growth  | 100 m                                 |                                                   | 0,0071                                            | 100 m                                 |                                                   | 0,0071                                            |
| Geomechanical | 100 m                                 |                                                   | 0,0071                                            | N/A                                   |                                                   |                                                   |
| Fault Seal    | 100 m                                 |                                                   | 0,0071                                            | 25 m                                  |                                                   | 0,0018                                            |

**Table 2.** Suggested optimum picking strategies, depending on analysis required, and their equivalent sampling interval/fault length ratio ( $\delta$ ).

995
